1     **Inhibition of HIV infection by structural proteins of the inner nuclear membrane is**  
2                     **associated with reduced chromatin dynamics**

3             Anvita Bhargava<sup>1</sup>, Mathieu Maurin<sup>1</sup>, Patricia M. Davidson<sup>2,@</sup>, Mabel Jouve<sup>3</sup>, Xavier

4                                     Lahaye<sup>1,#</sup>, Nicolas Manel<sup>1,#</sup>

5  
6     <sup>1</sup> Institut Curie, PSL Research University, INSERM U932, Paris, France.

7     <sup>2</sup> Laboratoire Physico-Chimie Curie, Institut Curie, CNRS UMR168, Sorbonne Université,  
8     PSL Research University, Paris, France.

9     <sup>3</sup> Institute Curie, UMR3215, Paris, France.

10

11     Correspondance : [nicolas.manel@curie.fr](mailto:nicolas.manel@curie.fr)

12     # Equal contribution

13     @ current address: Now at 4Dcell, Montreuil, France.

14

15

16 **Abstract**

17 The Human Immunodeficiency Virus (HIV) enters the nucleus to establish infection. HIV  
18 interacts with nuclear pore components to cross the nuclear envelope. In contrast, the role of  
19 other proteins of the nuclear envelope in HIV infection is not yet understood. The inner nuclear  
20 transmembrane proteins SUN1 and SUN2 connect lamins in the interior of the nucleus to the  
21 cytoskeleton in the cytoplasm. Increased levels of SUN1 or SUN2 potently restrict HIV  
22 infection through an unresolved mechanism. Here, we find that SUN1 and SUN2 exhibit a  
23 differential and viral strain-specific antiviral activity HIV-1 and HIV-2. In macrophages and  
24 HeLa cells, HIV-1 and HIV-2 are respectively preferentially inhibited by SUN1 and SUN2.  
25 This specificity maps to the nucleoplasmic domain of SUN proteins, which associates with  
26 Lamin A/C and participates to the DNA damage response. We find that etoposide, a DNA-  
27 damaging drug, stimulates infection. Inhibition of the DNA damage signaling kinase ATR,  
28 which induces a DNA damage response, also enhances HIV-1 infection. The proviral effect of  
29 ATR inhibition on infection requires the HIV-1 Vpr gene. Depletion of endogenous Lamin A/C,  
30 which sensitizes cells to DNA damage, also enhances HIV-1 infection in HeLa cells. SUN1  
31 overexpression neutralizes these proviral effects, while the antiviral effect of SUN2 is rescued  
32 by etoposide treatment. Finally, we show that inhibition of HIV-1 infection by overexpressed  
33 SUN proteins and endogenous Lamin A/C is associated with reduced internal movements of  
34 chromatin and reduced rotations of the nucleus. Altogether, these results highlight distinct  
35 antiviral activities of SUN1 and SUN2 and reveal an emerging role of nuclear movements and  
36 the DNA damage response in the control of HIV infection by structural components of the  
37 nuclear envelope.

38  
39

40

41

## 42 **Introduction**

43 Successful infection of cells by HIV requires an active transport of the virus through the  
44 physical barrier of the nuclear envelope. Nuclear entry of HIV is coordinated with the  
45 completion of reverse transcription and selection of integration sites (Dharan et al., 2020;  
46 Schaller et al., 2011). The capsid protein of HIV engages multiple interactions with nuclear  
47 pore complex (NPC) components and associated proteins such as Cyclophilin A to achieve this  
48 coordination (Yamashita and Engelman, 2017).

49 In the nuclear envelope, in addition to NPC proteins, SUN proteins located at the inner nuclear  
50 membrane impact HIV infection (Bhargava et al., 2018). SUN1 and SUN2 are integral proteins  
51 of the inner nuclear envelope of somatic cells. They play essential roles in the maintenance of  
52 genomic stability and the resolution of DNA damage (Lawrence et al., 2016; Lei et al., 2012).  
53 SUN proteins possess a lamin-binding domain at their N-terminus located in the nucleoplasm.  
54 Lamins are intermediated filament proteins that assemble the nuclear lamina, a dense meshwork  
55 contributing to mechanical protection, organization of chromatin domains and recruitment of  
56 DNA repair factors (Burke and Stewart, 2013; Gonzalo, 2014). At their C-terminus, SUN  
57 proteins interact with the KASH domains of nesprins in the perinuclear space. Nesprins are  
58 large integral proteins of the outer nuclear membrane (Burke and Stewart, 2013). Nesprins have  
59 multiple interactions with cytoskeletal proteins, enabling a dynamic anchoring of the nucleus  
60 within the cells.

61 SUN2 was first identified as an antiviral factor against HIV-1 in the context of a cDNA screen  
62 (Schoggins et al., 2011). Subsequent studies confirmed and extended the antiviral viral effect  
63 of SUN1 and SUN2 overexpression on HIV-1 and HIV-2 infection (Donahue et al., 2016;  
64 Lahaye et al., 2016; Luo et al., 2018; Schaller et al., 2017). SUN1 and SUN2 overexpression  
65 limits the level of HIV-1 nuclear import (Donahue et al., 2016; Luo et al., 2018; Schaller et al.,  
66 2017), leading to reduced viral integration. Furthermore, nanotubes of HIV-1 capsid and

67 nucleocapsid proteins produced *in vitro*, pull down SUN1 and SUN2 proteins from cell lysates,  
68 suggesting that SUN proteins and the viral capsid protein may interact directly or indirectly  
69 during infection (Schaller et al., 2017).

70 The role of endogenous SUN2 in HIV-1 infection has been examined but a consensus has not  
71 been reached (Donahue et al., 2017; Lahaye et al., 2016; Schaller et al., 2017; Sun et al., 2018).

72 Three studies concurred with a requirement for SUN2 in HIV-1 infection in primary CD4<sup>+</sup> T  
73 cells, in monocyte-derived dendritic cells and in THP-1 cells, although the strength of this  
74 requirement varies between cell type (Donahue et al., 2017; Lahaye et al., 2016; Schaller et al.,

75 2017). A fourth study obtained contradicting results and proposed that endogenous SUN2  
76 instead limits HIV infection at the level of viral promoter expression (Sun et al., 2018). We

77 initially proposed that HIV infection requires an optimal level of SUN2 protein, and that both  
78 depletion and overexpression impair infection, not necessarily through the same mechanism  
79 (Lahaye et al., 2016). This notion fits well with the structural role of the LINC complex in

80 nuclear architecture. Of note, endogenous SUN2 level varies with the extent of T cell activation  
81 (Sun et al., 2018). It is thus conceivable that variable experimental conditions between studies,

82 particularly using sensitive primary immune cells, could account for the variable effects of  
83 endogenous SUN2 on HIV infection. SUN2 is also implicated in the effects of Cyclophilin A

84 (CypA) on HIV-1 infection. In HeLa cells, SUN2 overexpression abrogates the sensitivity of  
85 HIV-1 capsid mutant N74D to Cyclophilin A inhibition (Lahaye et al., 2016). In primary CD4<sup>+</sup>

86 T cells and murine bone-marrow derived dendritic cells, endogenous SUN2 is required for the  
87 Cyclophilin A-dependent steps of HIV infection (Lahaye et al., 2016). Another study however,

88 did not observe this effect in primary CD4<sup>+</sup> T cells (Donahue et al., 2017). These differences  
89 may reflect the use of different read-outs for quantifying the impact of cyclophilin A inhibition

90 on infection.

91 Our understanding of the antiviral effect of SUN1 is less advanced. In HEK293A cells, the  
92 antiviral effect of SUN1 overexpression requires the interaction of Cyclophilin A with HIV-1  
93 capsid protein (Luo et al., 2018). In THP-1 cells, endogenous SUN1 is not required for HIV-1  
94 infection (Schaller et al., 2017).

95 The strong antiviral effect of SUN protein overexpression on HIV infection exploits one or  
96 several points of weakness in the viral replication cycle. The cellular mechanisms by which  
97 elevated levels of SUN expression block HIV infection are not known. Intriguingly, SUN2  
98 overexpression is associated with alteration of nuclear envelope shape, suggesting that SUN  
99 might interfere with HIV infection through a perturbation of the integrity of the nucleus  
100 (Donahue et al., 2016; Lahaye et al., 2016). However, it has not been possible so far to explain  
101 how SUN proteins are perturbing cellular and nuclear physiology to impact HIV.

102

103

## 104 **Results**

### 105 **SUN1 and SUN2 proteins demonstrate HIV strain-specific antiviral effects**

106 To gain insights in SUN1- and SUN2-mediated antiviral effects on the early steps of HIV  
107 infection, we first performed a comparative assessment of the antiviral effect of SUN1 and  
108 SUN2 on HIV infection in primary cells. To this end, we overexpressed SUN1 and SUN2 in  
109 primary monocyte-derived macrophages (MDMs) using lentiviral vectors (**Figure 1A**). In order  
110 to focus on the early phase of infection, cells were infected using single-round HIV-1 and HIV-  
111 2 encoding GFP in the place of the Nef gene. SUN1 and SUN2 induced an antiviral effect on  
112 HIV-1 and HIV-2 (**Figure 1B**). Unexpectedly, SUN1 and SUN2 did not show an identical  
113 antiviral effect on the two strains. The calculation of the ratio of inhibition by SUN1 over SUN2  
114 revealed that HIV-1 was preferentially inhibited by SUN1, while HIV-2 was preferentially  
115 inhibited by SUN2 (**Figure 1B**). In MDMs, HIV-1 infection is sensitive to inhibition by  
116 Cyclosporin A (CsA). CsA treatment did not further inhibit infection in cells overexpressing  
117 SUN1 or SUN2 (**Figure 1B**). We analyzed the progression of HIV-1 and HIV-2 infection in  
118 the context of SUN protein expression using RT-qPCR on viral DNA species. For HIV-1, both  
119 SUN1 and SUN2 overexpression reduced the level of integrated viral DNA (**Figure 1C**).  
120 However, SUN1 reduced the total amount of viral DNA, while SUN2 reduced the level of 2-  
121 LTR circles, that are a hallmark of viral entry into the nucleus. CsA reduced the total amount  
122 of viral DNA in control cells and there was no additional reduction following SUN protein  
123 expression. For HIV-2, SUN1 and SUN2 significantly reduced 2-LTR circles only. These  
124 experiments indicate that SUN1 and SUN2 have strain-specific antiviral effects and that they  
125 modify different steps of viral infection.

126 We similarly overexpressed SUN1 and SUN2 in HeLa cells (**Figure 1D**). SUN1 overexpression  
127 had a greater inhibitory effect on HIV-1 infection than SUN2 overexpression, whereas in HIV-  
128 2 infection, SUN2 overexpression had a greater effect than SUN1, recapitulating the results

129 obtained in MDMs (**Figure 1E, 1F**). In HeLa cells, wild-type HIV-1 is not sensitive to CsA,  
130 but HIV-1 CA N74D is, similar to HIV-1 WT in MDM (De Iaco and Luban, 2014). We thus  
131 used this mutant to address the relationship between the antiviral effect of SUN and CsA  
132 sensitivity. Both SUN1 and SUN2 abolished CsA sensitivity of HIV-1 CA N74D in HeLa cells  
133 (**Figure 1G, 1H**). We next measured the levels of HIV-1 DNA species. SUN1 and SUN2  
134 reduced the levels of integrated HIV-1 DNA and this effect was more pronounced for SUN1  
135 (**Figure S1A**). Similar to MDM, SUN1 significantly inhibited the level of total viral DNA while  
136 the levels of 2-LTR circles were not significantly reduced. In contrast, SUN2 did not impact  
137 the level of total viral DNA but reduced the level of 2-LTR circles. We thus focused on HeLa  
138 cells for additional experiments aiming at characterizing the strain-specific inhibition of SUN1  
139 and SUN2.

140

#### 141 **Strain-specific antiviral activity maps to the nucleoplasmic domain of SUN proteins**

142 Cell-cell communication factors of innate immunity, such as interferons and cGAMP, can  
143 contribute to antiviral effects on top of cell-intrinsic restriction factors. Using a co-culture of  
144 SUN1/2-expressing cells and control cells expressing a fluorescent marker (TagRFP657), we  
145 found that the strain-specific effect of SUN1 and SUN2 on HIV-1 and HIV-2 infection is  
146 entirely cell-intrinsic in HeLa cells (**Figure 2A**). To determine if SUN1 and SUN2 induced an  
147 antiviral state at the cell-intrinsic level through expression of other antiviral genes, we  
148 performed a transcriptomic analysis of SUN1 and SUN2 overexpressing cells. Strikingly, we  
149 could not detect any differentially expressed gene in this dataset, aside from SUN1 and SUN2  
150 themselves (**Figure S1B**). Next, we generated chimeras between SUN1 and SUN2 to map the  
151 strain-specific antiviral effect (**Figure 2B, 2C**). We found that the N-terminal nucleoplasmic  
152 domains of SUN1 and SUN2 confer strain-specificity (**Figure 2D, 2E**). These results establish

153 that SUN1 and SUN2 exert a cell-intrinsic HIV-strain specific antiviral effect on HIV infection,  
154 that maps to the nucleoplasmic domain of SUN proteins.

155

### 156 **Antiviral effect of SUN proteins at the nuclear envelope**

157 We next sought to study how SUN1 and SUN2 impact cells to inhibit HIV infection. Electron  
158 microscopy analysis revealed that both SUN1 and SUN2 overexpression induced deep  
159 invaginations of the nuclear envelope, that appeared more pronounced with SUN2 (**Figure 3A**).  
160 This raised the possibility that alteration of the shape of the nucleus could be responsible for  
161 the antiviral effect. To test this, we asked if the antiviral effect of SUN occurs at the nuclear  
162 envelope or whether it is the result of cytosolic accumulation of SUN proteins. SUN proteins  
163 form the LINC complex with nesprins at the nuclear envelope by interaction with their KASH  
164 domain within the perinuclear space. Expression of the isolated KASH domain (spectrin repeat-  
165 KASH, SR-KASH) functions as a dominant negative by disrupting the SUN-Nesprin  
166 interaction and displacing Nesprins from the nuclear envelope (Starr et al., 2003). We co-  
167 expressed SR-KASH with SUN proteins (**Figure 3B**). We found that co-expression of the SR-  
168 KASH construct partially rescued the antiviral effect on SUN1 and SUN2 on HIV-1 infection  
169 (**Figure 3C**). These results support the notion that SUN proteins have an antiviral activity at  
170 the nuclear envelope.

171

### 172 **Interplay between SUN proteins, HIV infection and the DNA damage response**

173 As a next step, we attempted to characterize the cellular processes affected by elevated levels  
174 of SUN proteins. SUN1 and SUN2 are required to limit the accumulation of DNA damage in  
175 cells (Lei et al., 2012). Since HIV infection is a DNA-damaging event, we considered the  
176 possible interplay between SUN proteins, HIV infection and the DNA damage response. We  
177 examined the level of  $\gamma$ H2AX, an early marker of the DNA damage response. At baseline, we



178 did not detect any modification of  $\gamma$ H2AX levels upon SUN1 or SUN2 expression (**Figure 4A,**  
179 **4B**). To induce DNA damage, we selected etoposide, a topo-isomerase II inhibitor.  
180 Interestingly, SUN1 overexpression but not SUN2, significantly limited the levels of induced  
181  $\gamma$ H2AX after etoposide treatment (**Figure 4A, 4B**). To explore the potential link between DNA  
182 damage and infection, we infected HeLa cells in the presence of etoposide for the first 4 hours  
183 of the experiment. However, etoposide gradually induces apoptosis of treated cells (Rello-  
184 Varona et al., 2006), which hampered our ability to detect viable cells to measure infection after  
185 48 hours. To circumvent this, we cultured cells in the presence of the caspase inhibitor Q-VD-  
186 Oph and lower doses of etoposide. Q-VD-Oph did not prevent  $\gamma$ H2AX induction by etoposide  
187 treatment (**Figure 4C**). Etoposide treatment increased HIV-1 infection by 2-fold on average  
188 (**Figure 4D**). HIV-2 infection was also increased but significantly at only one dose of etoposide  
189 tested, with a smaller fold change. Next, we combined SUN expression with etoposide to  
190 determine the epistatic relationship between DNA damage induction and SUN expression on  
191 the level of HIV infection. Here, we used a higher MOI to observe the antiviral effect of SUN  
192 proteins. The increase induced by etoposide treatment on control cells was consistently  
193 observed across experiments. Interestingly, SUN1 abrogated the proviral effect of etoposide  
194 treatment and in sharp contrast, etoposide treatment rescued cells from the antiviral effect of  
195 SUN2 (**Figure 4E, 4F**). Thus, SUN1 overexpression, which restricts HIV-1 infection more than  
196 SUN2, operates downstream of DNA damage induction, while SUN2 overexpression impacts  
197 infection upstream of DNA damage.

198

### 199 **DNA damage induction by ATR inhibition and role of HIV-1 Vpr**

200 Next, we looked for a different approach to induce DNA damage that would be functionally  
201 linked to the nuclear envelope. ATR is a DNA damage sensor and functions as a checkpoint at  
202 the nuclear envelope in response to mechanical stress (Kumar et al., 2014). ATR inhibition

203 heightens DNA damage in cells (Foote et al., 2018). Furthermore, in HIV-1, expression of the  
204 accessory protein Vpr causes DNA damage and activates ATR (Roshal et al., 2003), although  
205 the relevance of this effect in the context of virion-packaged Vpr is unknown. Considering the  
206 significance of ATR at the nuclear envelope and its relationship with Vpr, we asked if DNA  
207 damage induction by ATR inhibition, SUN and Vpr are functionally related. We inhibited ATR  
208 using AZD6738, a next-generation inhibitor with improved specificity (Foote et al., 2018). As  
209 expected, ATR inhibition increased the levels of  $\gamma$ H2AX in HeLa cells (**Figure 5A**). We next  
210 infected HeLa cells with p24-normalized and sucrose-cushion purified stocks of the HIV-1  
211 single-round virus and its HIV-1 vpr-deficient (vpr-) counterpart. ATR inhibition increased vpr-  
212 positive HIV-1 infection in HeLa cells by 2-fold, similar to etoposide treatment (**Figure 5B,**  
213 **left panel**). Concomitant SUN protein overexpression inhibited HIV-1 infection and abrogated  
214 the proviral effect of ATR inhibition, again similar to the etoposide treatment. Unexpectedly,  
215 the titer of the p24-normalized HIV-1 vpr- was slightly higher than the HIV-1 wild-type  
216 counterpart in HeLa cells, and HIV-1 vpr- was insensitive to ATRi (**Figure 5B, right panel**).  
217 However, HIV-1 vpr- remained fully sensitive to the antiviral effect of SUN protein expression.  
218 In sum, this data supports the idea that increased DNA damage favors HIV-1 infection of HeLa  
219 cells and that SUN1 operates downstream of this to block infection. Intriguingly, this data also  
220 revealed that sensitivity to ATR inhibition is a HIV-1 vpr phenotype in single-round infection  
221 of HeLa cells.

222

### 223 **Endogenous Lamin A/C limits HIV-1 infection in HeLa cells**

224 We sought to further explore the relationship between infection, DNA damage and structure of  
225 the nuclear envelope. We searched for an orthogonal approach to perturb the nuclear envelope  
226 structure and the DNA damage response. Lamin A/C expression is required to maintain a  
227 regular nuclear shape (Lammerding et al., 2004) and to protect from DNA damage (Singh et

228 al., 2013). We used short-hairpin RNA to reduce expression of Lamin A/C (**Figure 6A**). Similar  
229 to SUN protein overexpression, knock-down of Lamin A/C compromised the regularity of the  
230 nuclear envelope shape (**Figure 6B**). To quantify this effect, we measured the shape descriptor  
231 ‘solidity’ of the nucleus: solidity values close to 1 indicate smoothly convex nuclei while lower  
232 values correspond to deformed, lobulated nuclei, presenting concave invaginations.  
233 Overexpression of SUN proteins and silencing of lamin A/C increased nuclear envelope  
234 deformation, although this effect was less pronounced in cells overexpressing SUN1 (**Figure**  
235 **6C**). The endogenous levels of Lamin A/C and SUN proteins were not reciprocally affected by  
236 SUN overexpression or Lamin A/C silencing. (**Figure 6A**). After infection, Lamin A/C knock-  
237 down unexpectedly increased HIV-1 infection levels by 1.6-fold, while HIV-2 infection was  
238 not affected (**Figure 6D**). Lamin A/C thus limits HIV-1 infection in HeLa cells. However, the  
239 increase in nuclear envelope shape irregularities does not explain how lamin A/C depletion and  
240 SUN protein overexpression affect HIV infection. Given the opposing effects of SUN  
241 overexpression and Lamin A/C knock-down on HIV-1 infection, we examined if the antiviral  
242 effect of SUN proteins requires endogenous lamins. We knocked-down Lamin A/C, Lamin B1  
243 and Lamin B2 and co-expressed SUN proteins (**Figure 6E**). Viable Lamin B1-depleted HeLa  
244 cells could not be maintained in culture. Lamin A/C depletion enhanced HIV-1 infection as  
245 above, and Lamin B2 depletion had no effect (**Figure 6F**). SUN proteins maintained their  
246 antiviral effect irrespective of the level of Lamin A/C and Lamin B2. This shows that the effect  
247 of elevated levels of SUN proteins is dominant on the effect of Lamin A/C depletion on HIV-1  
248 infection.

249 Next, we examined the level of  $\gamma$ H2AX after etoposide treatment and Lamin A/C depletion.  
250 Treatment with a high dose of etoposide (500  $\mu$ M) for 24 hours induced an increase of  $\gamma$ H2AX  
251 level in wild-type HeLa cells, while a lower dose (50  $\mu$ M) had no impact at this time point  
252 (**Figure 6G**). In the absence of Lamin A/C, HeLa cells became hyper-sensitive to etoposide

253 treatment (**Figure 6G**). Thus, the increase in HIV-1 infection observed after Lamin A/C  
254 depletion correlates with an increased sensitivity to DNA damage. Altogether, these results  
255 establish a functional correlation between the effect of SUN protein and endogenous Lamin  
256 A/C on HIV-1 infection and on the cellular response to DNA damage induced by an exogenous  
257 compound.

258

### 259 **Elevated SUN proteins do not alter NPC density, passive import or cell stiffness**

260 We next sought to identify the mechanisms that delineate the effects of elevated SUN proteins  
261 and endogenous Lamin A/C depletion on infection. We characterized biophysical and structural  
262 parameters in SUN-expressing cells. HIV-1 enters the nucleus through NPCs. We labelled  
263 NPCs using a marker of Nup153 on tangential confocal microscopy sections of the nuclear  
264 envelope (**Figure S2A**). Overexpression of SUN proteins did not alter NPC density at the  
265 nuclear envelope (**Figure S2B**). To determine if the NPC functionality was impaired by SUN  
266 protein overexpression, we measured passive diffusion through the NPC using a Fluorescence  
267 Recovery After Photobleaching (FRAP) assay on ubiquitous GFP. SUN proteins had no impact  
268 on the rate of recovery of nuclear GFP (**Figure S2C, Movie 1**). Lamin A/C depletion reduces  
269 stiffness of the nuclear envelope, resulting in a more deformable nucleus (Lammerding et al.,  
270 2004). To determine if SUN proteins expression induced the opposite to match the effects on  
271 infection, we measured the viscoelastic properties of the nuclei using a microfluidic  
272 micropipette assay (Davidson et al., 2019). While we confirmed that Lamin A/C depleted cells  
273 are more deformable, expression of SUN proteins had no impact on nuclear deformability  
274 (**Figure S2D**).

275

### 276 **HIV-1 infection requires movement of the chromatin**

277 Next, we turned our attention to the endogenous state of chromatin. We performed live-imaging  
278 of cells with a DNA stain after SUN overexpression or Lamin A/C depletion. We observed that  
279 SUN1 and SUN2 overexpression appeared to lock the nucleus in place, while nuclei of Lamin  
280 A/C-depleted cells appeared highly dynamic (**Figure 7A, Movies 2–6**). We first asked whether  
281 the extent of chromatin movement inside the nuclei was altered. We isolated movies of single  
282 nuclei and performed a registration step to normalize X-Y positions and angle, therefore  
283 suppressing general nuclei displacement and rotation. We next measured chromatin movement  
284 in the registered nuclei by performing a particle image velocimetry (PIV) analysis. Strikingly,  
285 SUN1 and SUN2 overexpression reduced the displacement of chromatin over time and this  
286 effect was more pronounced with SUN1, while Lamin A/C depletion had the converse effect  
287 (**Figure 7B, S3A**). HeLa cells also exhibit seemingly random rotation of their nuclei, at various  
288 speeds and frequencies. Using the same dataset, we measured the rotation of the whole nucleus  
289 relative to the cytoplasm. We corrected the translational displacement of nuclei by registration  
290 and measured the angle of rotation over time using a custom-made analysis script (**Movie 7**).  
291 SUN1 and SUN2 reduced the average speed of nuclear rotation and the fraction of time spent  
292 rotating above a threshold of  $1^\circ$  (**Figure 7C, S3B**). The rotation of Lamin A/C-depleted nuclei  
293 was visibly higher than controls, but could not be reliably quantified due to the high levels of  
294 chromatin displacement that hampered the ability to set reference points. Overall, these results  
295 indicate that the impact of SUN and Lamin A/C proteins on HIV-1 infection is associated with  
296 the movement of chromatin within the cells.

297

298

## 299 **Discussion**

300 Our findings reveal that SUN1 and SUN2, though paralogs, have distinct effects on HIV  
301 infection. SUN1 overexpression is more efficient at inhibiting HIV-1 than SUN2. Meanwhile,  
302 SUN2 overexpression shows a marked antiviral activity against HIV-2. An analysis of the viral  
303 step impacted by these two proteins also reveals a discrepancy: while both SUN1 and SUN2  
304 overexpression reduces the level of integrated HIV-1 DNA, SUN1 also inhibits total viral DNA  
305 amount while SUN2 reduces the levels of 2-LTR circles, a hallmark of nuclear entry. We also  
306 reveal that SUN1 and SUN2 differ in their response to DNA damage and its impact on HIV  
307 infection. SUN1 limits the response to etoposide as measured by the levels of  $\gamma$ H2AX, while  
308 SUN2 enhances it. Strikingly, etoposide largely rescues the antiviral effect of SUN2  
309 overexpression on HIV-1, while SUN1 is resistant to this effect. This result suggests that SUN1  
310 and SUN2 may differ in the ways in which they establish interactions and functions within the  
311 nucleus, in line with previously reports showing non-redundant effects of SUN1 and SUN2 (Lei  
312 et al., 2009; Liu et al., 2007; Zhu et al., 2017)

313 Etoposide treatment also enhances the infection by HIV-1 by two-fold in HeLa cells in the  
314 absence of SUN protein overexpression, while HIV-2 is largely unaffected. Such a proviral  
315 effect of DNA damage has been previously observed in conditions of integrase inhibition  
316 (Ebina et al., 2012; Koyama et al., 2013). In contrast, it was previously reported that etoposide  
317 treatment inhibits HIV-1 infection in monocyte-derived macrophages (Mlcochova et al., 2018).  
318 We speculate that this is explained by the presence of a SAMHD1-dependent block in this cell  
319 type induced by etoposide in macrophages, but not in HeLa cells.

320 Similar to etoposide, ATR inhibition also enhances HIV-1 infection by 2-fold. The lack of  
321 requirement for ATR in HIV infection is consistent with prior studies (Ariumi et al., 2005;  
322 DeHart et al., 2005). Interestingly, the effect of ATR inhibition requires the presence of the Vpr  
323 gene in HIV-1. As a virus-encoded gene, Vpr has been shown to induce an ATR-dependent G2

324 arrest of the cell cycle (Zimmerman et al., 2006). Using purified and p24-normalized virus  
325 preparations, we made the unexpected observation that the Vpr-deficient virus is actually as  
326 infectious as the wild-type virus stimulated with ATR inhibition. In other words, in this  
327 asynchronous system of single-round infection of HeLa cells, the presence of the Vpr gene  
328 appears to provide a counter-intuitive two-fold reduction in infectivity of the virus, which is  
329 alleviated by ATR inhibition. However, Vpr has been associated with an enhanced expression  
330 for the viral LTR during G2 arrest (Goh et al., 1998). We speculate that in terms of viral  
331 replicative fitness, the reduction in single-round infectivity entailed by Vpr is cancelled out by  
332 this proviral effect of Vpr during G2 arrest. Of note, both SUN1 and SUN2 overexpression  
333 inhibit HIV-1 infection irrespective of ATR inhibition. In contrast, etoposide rescues the  
334 antiviral effect of SUN2 on HIV-1, raising the possibility that ATR itself might play a role in  
335 the rescue of the SUN2 antiviral effect.

336 Multiple lines of evidence from our work indicate that the structure of the nuclear envelope  
337 impacts HIV infection. The ability of SR-KASH to partially rescue the antiviral effects of SUN  
338 proteins indicates that the LINC complex, which is located at the nuclear envelope, is involved.  
339 Despite the important morphological changes induced by SUN protein expression, we did not  
340 observe any change at the level of gene expression, suggesting that any SUN-mediated effect  
341 on the nucleus and, subsequently, on HIV infection is post-transcriptional. ATR is enriched at  
342 the nuclear envelope during S phase and upon mechanical stretching, two processes that  
343 increase nuclear envelope stress (Kumar et al., 2014). ATR-deficient cells exhibit deformed  
344 nuclei, reminiscent of Lamin A/C depletion or SUN protein overexpression (Kidiyoor et al.,  
345 2020). Vpr overexpression was previously shown to induce herniations of the nuclear envelope  
346 associated with defects in the nuclear lamina (de Noronha et al., 2001). We also find that  
347 endogenous Lamin A/C has an antiviral effect, in agreement with a previous study (Sun et al.,  
348 2018).

349 We examined several effects of SUN protein overexpression and endogenous Lamin A/C on  
350 nuclear shape, deformability, NPC distribution and function and chromatin dynamics. The  
351 effects on HIV-1 infection match the effects of the proteins on chromatin dynamics: decreased  
352 HIV-1 infection is associated with a decreased chromatin motility inside the nucleus and with  
353 decreased rotation of the nucleus relative to the cytoplasm. In contrast, HIV-2 infection is more  
354 susceptible to SUN2 than SUN1 and is not affected by Lamin A/C depletion. Overexpression  
355 of SUN2 deforms nuclei more than SUN1 but internal chromatin dynamics and nuclear rotation  
356 are less impacted. This strain specificity could be linked to a different dependency on host  
357 factors between HIV-1 and HIV-2 (Braaten and Luban, 2001). SUN and Lamin proteins have  
358 been previously linked to chromatin mobility and nuclear rotation (Ji et al., 2007; Lottersberger  
359 et al., 2015; Oza et al., 2009; Ranade et al., 2019). Interestingly, nuclear rotation is required for  
360 optimal infection by another nuclear-invading virus, HCMV (Procter et al., 2018). This rotation  
361 is required to promote spatial chromatin segregation that favors viral gene expression (Procter  
362 et al., 2018). We propose that HIV-1 infection requires nuclear rotation and chromatin  
363 movements for optimal integration and subsequent viral expression.

364 Our results highlight the interplay between HIV infection, structural proteins of the nuclear  
365 envelope and the DNA damage response. Nuclear rotation and chromatin dynamics emerge as  
366 potentially important factors that control HIV infection. Future studies will be required to  
367 address the underlying molecular mechanisms, which we anticipate will require the use of  
368 biophysical approaches. It will also be important to examine these mechanisms in the frame of  
369 the diversity of lentiviruses and their relevance for viral replication and innate immune sensing  
370 mechanisms in primary target cells.

371



372 **Acknowledgments**

373 We thank N. De Silva for setting up the  $\gamma$ H2AX intranuclear staining; V. Teixeira Rodrigues  
374 for assistance with primary macrophages; P. Benaroch for critically reading this manuscript;  
375 M. Piel, N. De Silva, N. Jeremiah and A. Williart for discussions. We acknowledge the PICT-  
376 IBiSA imaging facility, member of the France-BioImaging national research infrastructure,  
377 supported by the CelTisPhyBio Labex (ANR-10-LBX-0038) part of the IDEX PSL (ANR-10-  
378 IDEX-0001-02 PSL), and Audrey Rapinat and David Gentien from the Genomics Platform at  
379 Institut Curie. This work was supported by Institut Curie, INSERM, and by grants from the  
380 Agence Nationale de la Recherche (ANR-10-IDEX-0001-02 PSL, ANR-11-LABX-0043,  
381 ANR-17-CE15-0025-01, ANR-19-CE15-0018-01, ANR-18-CE92-0022-01, France-  
382 BioImaging ANR-10-INSB-04), the Agence Nationale de la Recherche sur le SIDA  
383 (ECTZ36691, ECTZ25472, ECTZ71745), Sidaction (VIH2016126002, 17-1-AAE-11097-2).  
384 AB was supported by fellowships from PSL University and Fondation pour la Recherche  
385 Médicale, grant number 8250. PMD was supported by fellowships from La Ligue contre le  
386 Cancer (REMX17751) and Fondation ARC (PDF20161205227).

387

388

389

390 **Figure Legends**

391

392 **Figure 1 Distinct antiviral activities of SUN1 and SUN2 against HIV-1 and HIV-2**

393 **(A)** Detection of SUN1, SUN2 and actin in MDMs transduced with mTagBFP-2A control,  
394 SUN1 or SUN2 lentivectors (representative of n = 3).

395 **(B)** Left, viral titers as infectious units (i.u.) per mL based on percentages of GFP<sup>+</sup> MDMs 48  
396 hours after infection with serial dilutions of HIV-1 or HIV-2 encoding GFP in Nef and  
397 pseudotyped with VSV-G, with or without 2  $\mu$ M CsA (n = 9 donors, paired RM ANOVA one-  
398 way on Log-transformed titers with Sidak post-test, line at mean). Right, ratios of titer fold  
399 changes (FC) control over SUN1 (SUN1 FC) or control over SUN2 (SUN2 FC) (paired t-test,  
400 line at mean).

401 **(C)** Detection of HIV-1 total DNA, 2-LTR circles DNA and integrated DNA by RT-qPCR at  
402 24 hours after infection with HIV-1 or HIV-2 (dilution factor: 0.17) of MDMs transduced with  
403 mTagBFP-2A control, SUN1 or SUN2 lentivectors. Reverse transcriptase inhibitors  
404 Azidothymidine (AZT; 24  $\mu$ M) and Nevirapine (NVP; 10  $\mu$ M) were added during infection  
405 only on control cells (n=4 donors, paired RM ANOVA one-way with Sidak post-test, line at  
406 mean  $\pm$  SEM).

407 **(D)** Detection of SUN1, SUN2 and actin in HeLa cells transduced with mTagBFP-2A control,  
408 SUN1 or SUN2 lentivectors.

409 **(E)** GFP expression in BFP-positive HeLa cells transduced with mTagBFP-2A control, SUN1  
410 or SUN2 lentivectors, 48 hours after infection with indicated dilutions of HIV-1 and HIV-2  
411 (representative data from one experiment at the indicated dose of virus).

412 **(F)** Left, Viral titers based on percentages of GFP<sup>+</sup> cells after infection with serial dilutions of  
413 virus as in **(E)** (n = 6, paired RM ANOVA one-way on Log-transformed titers, with Dunnet's  
414 post-test, line at mean). Right, ratios calculated as in **(B)**.

415 **(G)** Percentage of GFP<sup>+</sup> in BFP<sup>+</sup> HeLa cells transduced with mTagBFP-2A control, SUN1 or  
416 SUN2 lentivectors, 48 hours after infection with serial dilutions of HIV-1 or HIV-1 CA N74D,  
417 with or without treatment with 2 μM of CsA (n = 3 independent experiments).

418 **(H)** Viral titers as in (G) (n = 3, paired RM ANOVA one-way on Log-transformed titers with  
419 Sidak's post-test, line at mean).

420 Ctrl = control, \*p < 0.05, \*\*\*p < 0.001, \*\*\*\*p < 0.0001; ns, not statistically significant.

421

## 422 **Figure 2 Mapping of the strain-specific antiviral activity of SUN proteins**

423 **(A)** mTagBFP-2A Ctrl, mTagBFP-2A-SUN1 and mTagBFP-2A-SUN2 expressing HeLa cells  
424 were co-cultured at a 1:1 ratio with HeLa cells expressing TagRFP657-2A and infected with  
425 serial dilutions of HIV-1 and HIV-2. Titters were calculated based on percentage of GFP<sup>+</sup> cells  
426 48 hours post-infection dilutions within the indicated populations (n=3 independent  
427 experiments, paired RM ANOVA one-way on Log-transformed titers with Sidak's post-test,  
428 line at mean).

429 **(B)** Schematic representation of chimeric proteins between full-length SUN1 (red) and SUN2  
430 (blue). Amino-acid residues retained in hybrid proteins are indicated within brackets.

431 **(C)** Detection of SUN1, SUN2 and actin in HeLa cells transduced with the indicated mTagBFP-  
432 2A lentivectors. Two antibodies targeting SUN2 that recognize different epitopes within the  
433 protein were used.

434 **(D)** Percentage of GFP<sup>+</sup> in BFP<sup>+</sup> HeLa cells transduced with the indicated mTagBFP-2A  
435 lentivectors, 48 hours after infection with serial dilutions of HIV-1 or HIV-2 (n=3 independent  
436 experiments).

437 **(E)** Viral titers based on percentages of GFP<sup>+</sup> cells shown in **(D)** (n=3, paired RM ANOVA  
438 one-way with Sidak's post-test, line at mean).

439 Ctrl = control, \*p < 0.05, \*\*p < 0.01, \*\*\*p < 0.001, \*\*\*\*p < 0.0001; ns, not statistically significant.

440

441 **Figure 3 SUN proteins inhibit HIV infection at the nuclear envelope**

442 (A) Representative electron micrograph showing nuclei in control, SUN1 and SUN2  
443 overexpressing HeLa cells (scale: 10, 2 and 5  $\mu\text{m}$  respectively).

444 (B) Detection of SUN1, SUN2, GFP and actin in HeLa cells transduced with TagRFP657-  
445 expressing control, SUN1 or SUN2 lentivectors, combined with control GFP or SR-KASH DN  
446 fused to GFP expressing lentivectors. The same lysates were loaded onto two separate  
447 membranes, the housekeeping control is shown for both.

448 (C) Top, percentage of BFP<sup>+</sup> within tagRFP657<sup>+</sup> HeLa cells 48 hours after infection with serial  
449 dilutions of HIV-1 encoding BFP in the place of Nef, pseudotyped with VSV-G. Bottom, viral  
450 titers based on percentages of BFP<sup>+</sup> cells (n=3, paired RM ANOVA one-way on Log-  
451 transformed titers, with Sidak's post-test, line at mean  $\pm$  SEM).

452 Ctrl = control, \*p < 0.05, \*\*p < 0.01, \*\*\*p < 0.001; ns, not statistically significant.

453

454 **Figure 4 Interplay between HIV-1 infection, SUN protein and the DNA damage response**

455 (A) Viability and  $\gamma\text{H2AX}$  intracellular staining in HeLa cells transduced with mTagBFP-2A  
456 control, SUN1 or SUN2 lentivector, 24 hours after treatment with 500  $\mu\text{M}$  of etoposide or 1%  
457 DMSO as control (representative experiment from n = 3).

458 (B) Quantification of  $\gamma\text{H2AX}^+$  HeLa cells treated as in (A) (n=4, paired RM ANOVA one-way  
459 with Sidak's post-test, line at mean).

460 (C) Quantification of  $\gamma\text{H2AX}^+$  HeLa cells 24 hours after a 4-hour treatment with 5  $\mu\text{M}$ , 50  $\mu\text{M}$   
461 etoposide or corresponding DMSO control. 50  $\mu\text{M}$  of Q-VD-Oph were present throughout the  
462 experiment (n=3, paired RM ANOVA one-way with Sidak's post-test, line at mean  $\pm$  SEM).

463 (D) Top, percentage of GFP<sup>+</sup> HeLa cells 48 hours after infection with two dilutions of HIV-1  
464 or HIV-2, treated as in (C). Cells were treated and infected simultaneously, the drugs and the

465 virus were washed out at 4 hours post-treatment/infection. 50  $\mu$ M of Q-VD-Oph were  
466 maintained throughout the experiment. Bottom, viral titers based on percentages of GFP<sup>+</sup> cells  
467 (n=3, paired RM ANOVA one-way with Sidak's post-test, line at mean).

468 **(E)** Quantification of  $\gamma$ H2AX<sup>+</sup> HeLa cells, transduced with mTagBFP-2A control, SUN1 or  
469 SUN2 lentivectors, 4 hours after treatment with 50  $\mu$ M of etoposide or corresponding DMSO  
470 control (n=3, paired RM ANOVA one-way with Sidak's post-test, line at mean  $\pm$  SEM).

471 **(F)** Left, percentage of GFP<sup>+</sup> cells in BFP<sup>+</sup> HeLa cells expressing control, SUN1, SUN2  
472 lentivectors and treated as in **(E)**, 48 hours after infection with purified HIV-1 env-nef-,  
473 expressing GFP in the place of Nef and pseudotyped with VSV-G. Right, GFP<sup>+</sup> percentages at  
474 viral dilution 0.02 (n=3, experimental pairs are indicated; RM ANOVA two-way test,  
475 uncorrected Fischer' LSD). 50  $\mu$ M of Q-VD-Oph were maintained throughout the experiment.

476 Ctrl = control, hpt = hours post treatment, \*p < 0.05, \*\*p < 0.01, \*\*\*p < 0.001, \*\*\*\*p < 0.0001; ns,  
477 not statistically significant.

478

479 **Figure 5 DNA damage induction by ATR inhibition stimulates HIV-1 infection in a Vpr-**  
480 **dependent manner**

481 **(A)** Top,  $\gamma$ H2AX intracellular staining in mTagBFP-2A control HeLa cell line, 24 hours after  
482 treatment with either 1  $\mu$ M of AZD6738 or 0.01% DMSO (representative experiment). Bottom,  
483 quantification of specific  $\gamma$ H2AX staining as geometric mean fluorescence intensity (GeoMFI)  
484 of the antibody signal divided by the GeoMFI of the isotype control (n=4, paired t-test, \*p <  
485 0.05, line at mean  $\pm$  SEM).

486 **(B)** Viral titers based on percentages of GFP<sup>+</sup> cells, within BFP<sup>+</sup> HeLa cells expressing Ctrl,  
487 SUN1 or SUN2 lentivector, with or without treatment with 1  $\mu$ M of AZ6738, 48 hours after  
488 infection with serial dilutions of purified, p24-normalized, HIV-1 env-nef- or HIV-1 env-nef-

489 vpr- encoding GFP in the place of Nef, pseudotyped with VSV-G (n=3, paired RM ANOVA  
490 one-way with Sidak's post-test, line at mean  $\pm$  SEM).

491 Ctrl = control, hpt = hours post treatment, \*p < 0.05, \*\*\*p < 0.001, ns, not statistically significant.

492

493 **Figure 6 Interplay between HIV-1 infection, Lamin A/C protein and the DNA damage**  
494 **response**

495 **(A)** Detection of SUN1, SUN2, Lamin A/C and actin in HeLa cells transduced with mTagBFP-  
496 2A control, SUN1 or SUN2 lentivectors, negative control LacZ (shLACZ) or lamin A/C  
497 (shLMNA) targeting shRNA-encoding lentivectors.

498 **(B)** Nuclei of HeLa cells lines as in (A) visualized on fixed cells using SiR-DNA dye. Images  
499 show signal from an individual, central confocal plane, scale bar is at 10  $\mu$ m.

500 **(C)** Solidity index of nuclei as in **(B)**. Legend indicates total number of nuclei analyzed per cell  
501 line (representative of n=2 experiments, one on fixed cells and one with live imaging). Unpaired  
502 ANOVA one-way with Sidak's, line at median.

503 **(D)** Viral titers based on percentages of GFP<sup>+</sup> HeLa cells lines from **(A)** after infection with  
504 serial dilutions of HIV-1 and HIV-2 (n=3, paired RM ANOVA one-way with Sidak's post-test,  
505 line at mean).

506 **(E)** Detection of SUN1, SUN2, Lamin A/C, Lamin B2 and actin in HeLa cells co-transduced  
507 with mTagBFP-2A control, SUN1 or SUN2 lentivectors and with LacZ, lamin A/C or lamin  
508 B2 (shLMNB2) targeting shRNA-encoding lentivectors.

509 **(F)** Viral titers based on percentages of GFP<sup>+</sup> HeLa cells as shown in **(E)** after infection with  
510 serial dilutions of HIV-1 and HIV-2 (n=3, paired RM ANOVA one-way with Sidak's post-test,  
511 line at mean).

512 **(G)** Quantification of  $\gamma$ H2AX<sup>+</sup> HeLa cells transduced with either a LacZ or lamin A/C targeting  
513 shRNA lentivector, 24 hours after treatment with indicated doses of etoposide or DMSO control  
514 (n=3, line at mean  $\pm$  SEM).

515 Ctrl = control, hpt = hours post treatment, \*p < 0.05, \*\*p < 0.001, \*\*\*p < 0.001, \*\*\*\*p < 0.0001;  
516 ns, not statistically significant.

517

518 **Figure 7 SUN protein overexpression and endogenous Lamin A/C limit movements of the**  
519 **chromatin**

520 **(A)** Particle Image Velocimetry (PIV)-of DNA within nuclei of HeLa cells transduced with  
521 mTagBFP-2A control, SUN1 or SUN2 lentivectors, negative control LacZ or lamin A/C  
522 targeting shRNA-encoding lentivectors. PIV is shown for individual representative nuclei of  
523 each cell line, top panels show overall flow and bottom panels show individual vectorial  
524 displacements between two consecutive frames corresponding to two minutes of imaging. Scale  
525 bar corresponds to 5  $\mu$ m. Reference color scale for pixel displacement per time frame is shown  
526 on left.

527 **(B)** Quantification of DNA displacement as  $\mu$ m/min from images as in **(A)**. Results are shown  
528 for one experiment from n = 2. Left, unpaired ANOVA one-way with Sidak's post-test, line at  
529 mean. Right, unpaired student t-test, line at mean.

530 **(C)** Quantification of nuclear rotation speed as degrees/minute (top) and rotation duration as  
531 fraction of total time spent rotating over a threshold of 1° (bottom) in HeLa cells transduced  
532 with mTagBFP-2A control, SUN1 or SUN2 lentivectors and imaged as in **(A)**. Results are  
533 shown for one experiment from n = 2. Unpaired ANOVA one-way with Sidak's (top) or  
534 Turkey's (bottom) post-test, line at mean.

535 Ctrl = control, \*p < 0.05, \*\*p < 0.01, \*\*\*\*p < 0.0001; ns, not statistically significant.

536

537 **Supplemental Material**

538 **Figure S1 HIV-1 DNA quantification and gene expression analysis of SUN-overexpressing**  
539 **cells**

540 **(A)** Detection of HIV-1 total DNA, 2-LTR circles DNA and integrated DNA by RT-qPCR at  
541 24 hours after infection (dilution factor: 0.1) of HeLa cells transduced with mTagBFP-2A  
542 control, SUN1 or SUN2 lentivectors. AZT (24  $\mu$ M) was added during infection when indicated  
543 (n=3, paired RM ANOVA one-way with Turkey's post-test, line at mean  $\pm$  SEM).

544 **(B)** Differential gene expression in SUN1 (Left) and SUN2 (Right) overexpressing cells over  
545 control cells (FC, fold change; FDR, false discovery rate). Overexpressed SUN2 was codon-  
546 optimized, rendering it sub-optimal for probe-based detection.

547 Ctrl = control, \*  $p < 0.05$ , \*\*  $p < 0.001$ , \*\*\*  $p < 0.001$ ; ns, not statistically significant.

548

549 **Figure S2 Analysis of NPC density, passive nuclear import and cellular stiffness of SUN-**  
550 **overexpressing cells**

551 **(A)** Left, confocal imaging of NUP153 staining in HeLa cells. Right, blow-up or region of  
552 interest and detection of individual of NPC (red) using "Find Maxima" function. A  
553 representative nucleus of cells overexpressing mTagBFP-2A-SUN2 is shown.

554 **(B)** Quantification of NPC density per  $\mu\text{m}^2$  in nuclei from HeLa cells transduced with  
555 mTagBFP-2A control, SUN1 or SUN2 lentivectors, imaged and analyzed as in **(A)** (total  
556 number of nuclei analyzed per cell line are indicated, n=1 experiment; un-paired ANOVA one-  
557 way with Sidak's post-test, line at mean).

558 **(C)** Passive diffusion from the cytoplasm to the nucleus measured by FRAP, in HeLa cells  
559 transduced with mTagBFP-2A control, SUN1 or SUN2 lentivectors and a lentivector encoding  
560 GFP. Top, representative layout of a photobleached control HeLa cell: imaging starts at  $t = 0$   
561 after high intensity laser exposure and ends at  $t = 80$  seconds, when fluorescence in the nucleus



562 has been recovered (scale bar: 5  $\mu\text{m}$ ). Bottom left: GFP intensity recovery over time (s). For  
563 each individual cell, the background intensity was subtracted and intensity was normalized to  
564 0 at  $t_0$  after photobleaching while the max intensity reached during the course of each  
565 measurement was set to 1. Curves show mean and standard deviation per time point across  
566 indicated number of cells per condition. Bottom right, hillslopes for each cell were calculated  
567 via non-linear regression fit (total number of nuclei analyzed per cell line are indicated,  $n=1$   
568 experiment; un-paired ANOVA one-way with Dunnett's post-test, line at mean  $\pm$  SEM).

569 **(D)** Measurement of nuclear deformability. Left, representative image showing tagBFP-2A-  
570 Ctrl HeLa cells stained with SiR-DNA and going through microchannels under externally-  
571 applied pressure. The green arrow indicates the elongation of SiR-DNA staining within the  
572 channel, which is measured over time as a readout for nuclear deformability. Right,  
573 quantification of nuclear deformability across HeLa cell lines described in **(6A)** over time (the  
574 number of nuclei measured per cell line is indicated within brackets,  $n = 3$  independent  
575 experiments).

576 Ctrl = control, ns, not statistically significant.

577

578 **Figure S3 SUN protein overexpression and endogenous Lamin A/C limit movements of**  
579 **the chromatin, second experiment.**

580 **(A)** Quantification of DNA displacement as  $\mu\text{m}/\text{min}$  from images as in Figure 7B, second  
581 experiment. Top, unpaired ANOVA one-way with Sidak's post-test, line at mean. Bottom,  
582 unpaired student t-test, line at mean.

583 **(B)** Quantification of nuclear rotation speed as degrees/minute (top) and rotation duration as  
584 fraction of total time (bottom) spent rotating over a threshold of  $1^\circ$ , as in Figure 7C, second  
585 experiment. Unpaired ANOVA one-way with Sidak's (top) or Turkey's (bottom) post-test, line  
586 at mean.

587 Ctrl = control, \* $p < 0.05$ , \* $p < 0.01$  \*\*\* $p < 0.001$ , \*\*\*\* $p < 0.0001$ ; ns, not statistically significant.

588

589

590 **Movie 1 Passive diffusion from the cytoplasm to the nucleus measured by FRAP.**

591 Representative movie of a HeLa cell overexpressing mTagBFP-2A-Ctrl and ubiquitous GFP

592 lentivectors. Immediately prior to imaging, high intensity 488 nm laser was directed to a small

593 region within the nucleus to bleach the GFP signal within this compartment. Imaging of the

594 whole cell starts at  $t = 0$  immediately after bleaching. Recovery of the GFP signal in the nucleus

595 is observed as GFP diffuses back in from the cytoplasm until equilibrium is obtained. One frame

596 was taken every 2 seconds.

597

598 **Movies 2 Quantification of chromatin dynamics in mTagBFP-2A-overexpressing control**

599 **HeLa cells.**

600 Chromatin dynamics assessed by PIV. The analysis was performed on live confocal imaging

601 of DNA staining using SiR-DNA. An image was taken every 2 minutes. The left panel shows

602 registration of the object (one nucleus) across 10 time frames while the right panel shows the

603 flow of pixel clusters (interrogation windows) within the object, across consecutive time

604 frames. Warmer colors indicate high levels of displacement while cold colors indicate more

605 static regions. Scale bar corresponds to 5  $\mu\text{m}$ .

606

607 **Movie 3 Quantification of chromatin dynamics in mTagBFP-2A-SUN1-overexpressing**

608 **HeLa cells.**

609 Analysis was performed as for Movie 2.

610

611 **Movie 4 Quantification of chromatin dynamics in mTagBFP-2A-SUN2-overexpressing**

612 **HeLa cells.**

613 Analysis was performed as for Movie 2.

614

615

616 **Movie 5 Quantification of chromatin dynamics in HeLa cells expressing a control shRNA**

617 **against LacZ.**

618 Analysis was performed as for Movie 2.

619

620 **Movie 6 Quantification of chromatin dynamics in HeLa cells expressing a shRNA against**

621 **Lamin A/C.**

622 Analysis was performed as for Movie 2.

623

624 **Movie 7 Measurement of nuclear rotation in a HeLa cell.**

625 The analysis was performed on live confocal imaging of DNA staining using SiR-DNA. An

626 image was taken every 2 minutes, for a total duration of 60 minutes. The angle was measured

627 in reference to an image containing 2 fixed points (one at the center and one on the edge of the

628 nucleus). In this example, HeLa overexpressing mTagBFP-2A control are shown.

## 629 **Materials and methods**

### 630 Constructs

631 The plasmid constructs for lentiviral expression and HIV infection used in this study are listed  
632 in **Table 1**. pTRIP-SFFV-tagBFP-2A-SUN1 Dharmacon was generated by overlapping PCR  
633 cloning from commercially bought cDNA (MGC cDNA cloneID: 40148817) into pTRIP-  
634 SFFV-tagBFP-2A (Cerboni et al., 2017). pTRIP-SFFV-tagBFP-2A-ntSUN2 was generated by  
635 overlapping PCR mutagenesis from pLX304-SUN2 (Lahaye et al., 2016) into pTRIP-SFFV-  
636 tagBFP-2A with concomitant introduction of silent mutations that are not targeted by SUN2  
637 shRNA 4 and 5 (respectively GAGCCTATTCAGACGTTTCACTTT to  
638 GAACCGATCCAAACTTTCCATTTTC and AAGAGGAAATCCAGCAACATGAAG to  
639 AAACGCAAGAGTTCTAATATGAAA). pTRIP-SFFV-tagBFP-2A-SUN1 Dharmacon (1-  
640 298)-ntSUN2 (220-717) and pTRIP-SFFV-tagBFP-2A-ntSUN2 (1-219)-SUN1 Dharmacon  
641 (299-785) were generated by overlapping PCR cloning from the full-length constructs. pTRIP-  
642 SFFV-tagRFP657-2A-SUN1 and pTRIP-SFFV-tagRFP657-2A-ntSUN2 were generated via  
643 restriction enzyme digestion from the tagBFP expressing vectors and ligation into pTRIP-  
644 SFFV-TagRFP657-2A backbone. HIV-GFP env-nef- was generated by PCR-mediated  
645 insertion of the Vpr+Vif+Vpu+ cassette from NL4-3 into HIV-GFP (Manel et al., 2010). HIV-  
646 GFP env-nef-vpr- was generated by overlapping PCR mutagenesis from HIV-GFP env-nef-,  
647 introducing a frameshift mutation within *vpr*, after the codon corresponding to amino-acid I63  
648 (gaattc to gaaTTAAttc). HIV-mTagBFP2 and HIV-2 ROD9  $\Delta$ env $\Delta$ nef mTagBFP2+ were  
649 obtained via overlapping PCR mutagenesis, replacing GFP with the mTagBFP from pTRIP-  
650 SFFV-mTagBFP-2A.

651

### 652 Cells

653 GHOST (GHOST X4R5), 293FT and HeLa cells were cultured in DMEM with Glutamax, 10%  
654 fetal bovine serum (FBS) (Corning), and penicillin-streptomycin (Gibco). Human peripheral  
655 blood mononuclear cells (PBMCs) were isolated from buffy coats from normal human donors  
656 (approved by the Institut National de la Santé et de la Recherche Médicale ethics committee)  
657 using Ficoll-Paque PLUS (GE). CD14<sup>+</sup> cells were isolated by a positive selection with anti-  
658 human CD14 magnetic beads (Miltenyi) from PBMCs. To obtain macrophages (MDMs),  
659 CD14<sup>+</sup> cells were cultured in RPMI with Glutamax, 5% FBS (Eurobio), 5% human serum  
660 (Sigma), Penicillin-Streptomycin, Gentamicin (50 µg/ml, GIBCO) and HEPES (GIBCO) in the  
661 presence of recombinant human M-CSF (Miltenyi) at 50 ng/ml. Fresh media was added at day  
662 5 or 6, and cells were treated/infected at day 9, after detachment via incubation with StemPro  
663 Accutase Cell Dissociation Reagent (Gibco) for 30 minutes at 37°C. Drug treatments performed  
664 on cultured cells are listed in **Table 2**.

665

#### 666 Virus production

667 Viral particles were produced by transfection of 293FT cells in 6-well plates with 3 µg DNA  
668 and 8 µl TransIT-293 Transfection Reagent (Mirus Bio) per well. For VSV-G pseudotyped  
669 SIVmac virus-like particles (VLPs), 0.4 µg CMV-VSVG and 2.6 µg pSIV3<sup>+</sup> was used. For  
670 VSV-G pseudotyped HIV-1 and HIV-2 GFP or BFP-reporter viruses, 0.4 µg CMV-VSVG and  
671 2.6 µg HIV DNA was used. For overexpression or sh-RNA mediated knock-down, 0.4 µg  
672 CMV-VSVG, 1 µg psPAX2 and 1.6 µg of lentivector of interest were combined. One day after  
673 transfection, media was removed, cells were washed once, and 3 ml per well of RPMI medium  
674 with Glutamax, 10% FBS (Gibco), PenStrep (Gibco), 50µg/ml Gentamicin (Gibco) and 0.01 M  
675 HEPES (Gibco) were added. Viral supernatants were harvested 1 day later, filtered using  
676 0.45 µm pore filters, used fresh or aliquoted and frozen at -80°C. When required, the virus was  
677 purified and concentrated on a 20% sucrose cushion in phosphate buffered saline (PBS) in Ultra

678 Clear Centrifuge tubes (Beckman Coulter), via ultracentrifugation at 4°C at 31,000 x g in a  
679 SW32Ti swinging bucket rotor (Beckman Coulter). Viral pellets were then resuspended in  
680 complete medium at a 100-fold concentration compared to crude. Viral titers were measured  
681 on GHOST cells (titration as previously described (Manel et al., 2010) or using HIV-1 p24  
682 ELISA (XpressBio). ELISA absorbance acquisitions were acquired on a FLUOstar OPTIMA  
683 (BMG Labtech) and data were analyzed and exported to Excel with MARS Data Analysis  
684 Software (BMG Labtech).

685

#### 686 Cell Transduction for protein overexpression or knockdown

687 HeLa cells were counted and seeded in 6-well plates on the day prior to transduction. Purified  
688 virus was added at a 2:1 volume ratio on medium containing protamine at a final concentration  
689 of 1 µg/ml. CD14<sup>+</sup> monocytes were seeded in 10-cm dishes in the presence of 50 ng/ml M-CSF  
690 to induce differentiation into macrophages and transduced with purified SIVmac VLPs and  
691 lentiviruses carrying vector of interest, mixed at a 1:1 ratio. Human serum was added at day 1  
692 post transduction. Transductions of monocytes was performed in the presence of protamine at  
693 a final concentration of 1 µg/ml. HeLa cells were washed once in PBS and passaged at 48 hours  
694 post transduction with or without 2 µg/ml of puromycin. For MDMs, medium was replaced at  
695 day 5-6 post transduction. Overexpression was assessed by quantification of fluorescent  
696 reporter signal via flow cytometry on a BD FACSVers flow cytometer. Both overexpression  
697 and protein knock-down were confirmed by Western Blotting at day of experiment.

698

#### 699 Cell infection

700 HeLa, GHOST and MDMs (day 8-9 post transduction) were seeded and infected in the presence  
701 of 1 µg/ml of protamine with serial dilutions of frozen viral stocks in a BSL-3 laboratory. Virus  
702 was removed at 48 hours post-infection, cells were washed, harvested, stained for viability

703 using Fixable Viability Dye eFluor 780 in PBS where required, fixed in 1% paraformaldehyde  
704 (PFA; Electron Microscopy Sciences) and analyzed for GFP or BFP positivity via flow  
705 cytometry on a BD FACSVerser flow cytometer. Viral titers were calculated based on seeded  
706 cell number and the percentages of infected cells, within the linear range of infection.

707

#### 708 HIV DNA quantification

709 HeLa cells and MDMs were infected as described, with the addition of infected wells treated  
710 with RT inhibitors as negative control. For this purpose, either 24  $\mu$ M of AZT (Sigma) or 10  
711  $\mu$ M of NVP (Sigma) were used. After 24 hours, cells were washed in PBS and harvested. Total  
712 DNA was extracted from cell pellets using NucleoSpin Tissue (Macherey-Nagel) kit, as per  
713 manufacturer's protocol. Real-time PCR analysis was performed as previously described  
714 (Lahaye et al., 2013). Each sample was measured in triplicate for all primers. For beta-globin,  
715 primers were bglobin-f and bglobin-r. Cycling conditions were 1x 95°C for 5'; 35x 95°C for  
716 10'', 65°C for 20'' (50°C for beta-globin) and 72°C for 30''. Relative concentrations of total  
717 DNA (Late RT), 2-LTR circles and integrated viral DNA were calculated relative to beta-globin  
718 using the  $\Delta$ Ct method. The primers used are listed in **Table 3**.

719

#### 720 Western Blotting

721 0.5 to 1 million cells were lysed in 100  $\mu$ L of RIPA buffer (50mM Tris HCl, 150mM NaCl,  
722 0.1% SDS, 0.5% DOC, 1% NP-40, Protease inhibitor (Roche; 1187358001)). Lysis was  
723 performed on ice for 30'. Lysates were cleared by centrifugation at 8000 g for 8 minutes at 4°C,  
724 20  $\mu$ l of Laemmli 6x (12% SDS, 30% Glycerol, 0.375M Tris-HCl pH 6.8, 30% 2-  
725 mercaptoethanol, 1% bromophenol blue) was added and samples were boiled at 95°C for 15'.  
726 Cellular protein lysates were resolved on Criterion or 4%–20% Bio-Rad precast SDS-PAGE  
727 gels and transferred to PVDF membranes (Bio-Rad). Membranes were saturated and proteins

728 were blotted with antibodies in 5% non-fat dry milk, PBS 0.1% Tween buffer. ECL signal  
729 generated via Clarity Western ECL substrate (Bio-Rad) was recorded on the ChemiDoc-XRS  
730 or ChemiDoc Touch Bio-Rad Imager. Data was analyzed and quantified with the Image Lab  
731 software (Bio-Rad). The antibodies used in this study are listed in **Table 4**.

732

### 733 Live Confocal Imaging

734 For live imaging, HeLa cells were plated either in a glass bottom FluoroDish (World Precision  
735 Instruments) or in a glass-bottom Cellview Cell Culture Dish with 4 compartments (Greiner  
736 Bio-One), on the day prior to experiments. One hour before imaging, cells were incubated with  
737 1  $\mu$ M of SiR-DNA (Tebu Bio), directly in the culture medium, at 37°C. Images of cells were  
738 acquired with a Leica DmI8 inverted microscope equipped with an SP8 confocal unit using a  
739 20x dry objective (NA=0.75, pixel size was fixed to 0.284  $\mu$ m). Imaging was performed in an  
740 on-stage incubator chamber at 37°C, with 5% CO<sub>2</sub>. An image per condition was taken every 2  
741 minutes, unless specified otherwise.

742 Image analysis was performed using Fiji software (Schindelin et al., 2012). For chromatin  
743 dynamics analysis, a homemade macro was first used to do segmentation of each nucleus on  
744 the movie and identify them using the 3D object counter. Particle Image Velocimetry (PIV)  
745 analysis was then performed on SiR-DNA staining using the PIV plug-in (Tseng et al., 2012).  
746 PIV is a basic optic flow analysis, that divides each image of a stack in small clusters of pixels  
747 (interrogation windows) and measures the displacement of each cluster between pairs of  
748 consecutive frames. The cross-correlation then generates a pattern of “movements” within the  
749 nucleus that are color-coded based on the amplitude of the vector corresponding to the  
750 displacement of each cluster. An in-house script was used to first align each individual nucleus,  
751 then measure and average SiR-DNA displacements over the ten first time points. Red shades  
752 indicate higher amplitudes of displacement while violets correspond to quasi-immobile



753 clusters. For nuclear rotation analysis, a macro was used to measure rotation angles across the  
754 first 30 frames. Briefly, individual nuclei were first aligned using a translation transformation  
755 of the MultiStackReg plug-in (Brad Busse, Stanford), then they were aligned using the rotation  
756 transformation and the transformation was applied to a reference image containing 2 fixed  
757 points (one at the center and one on the edge) to measure the rotation. A threshold of 1  
758 degree/minute was used to define rotating nuclei. The percentage of rotation time and the  
759 average velocity was then computed.

760

### 761 Confocal Immunofluorescence Imaging

762 For immunofluorescence, HeLa cells were grown overnight onto 12 mm glass coverslips  
763 (Thermo Scientific) placed in 6-well plates. Cells were fixed with 4% PFA for 20 minutes at  
764 room temperature. Coverslips were washed multiple times with PBS and quenched with 0.1M  
765 Glycine in PBS(Life Technologies) for 10 minutes at room temperature. Coverslips were then  
766 blocked with PBS, 0.2% (w/v) bovine serum albumin (BSA) (Euromedex), 0.05% (w/v)  
767 Saponin from quillaja bark (SIGMA) for 30 minutes at room temperature. Cells were stained  
768 overnight with anti-NUP153 antibody at 2  $\mu\text{g}/\text{mL}$  (1:50 dilution) or with Normal Rabbit IgG  
769 Isotype Control at corresponding concentration of the primary antibody, in PBS, 0.2% (w/v)  
770 BSA, 0.05% (w/v) Saponin + 10% goat serum (Sigma), at 4°C in a humidified chamber. The  
771 following day, cells were washed multiple times and incubated with the secondary antibody  
772 Alexa Fluor 546 goat anti-rabbit IgG (H+L) (Invitrogen; 1:200 dilution in PBS-BSA-Saponin)  
773 in the presence of 1  $\mu\text{M}$  of SiR-DNA for 2 hours in the dark, at room temperature. Coverslips  
774 were washed multiple times in PBS-BSA-Saponin and finally rinsed once in distilled water.  
775 Coverslips were mounted onto glass slides using Fluoromount G (eBioscience) mounting  
776 medium. The slides were finally dried at 37°C for 1h and stored at 4°C. Cells were imaged with

777 a Leica DmI8 inverted microscope equipped with an SP8 confocal unit using an oil immersion  
778 63x objective (NA=1.4) with applied Type F Immersion Liquid (Leica).

779

#### 780 Fluorescence Recovery After Photobleaching

781 Cells were seeded at  $2.5 \times 10^5$  cells/dish in a glass bottom FuoroDish (World Precision  
782 Instruments) on the day prior to the experiment. Cells were imaged with a Leica DmI8 inverted  
783 microscope equipped with an SP8 confocal unit using a 20x dry objective (NA=0.75). Imaging  
784 was performed in an on-stage incubator chamber at 37°C, with 5% CO<sub>2</sub>. Two independent  
785 modules were used in a sequential manner: one for bleaching, one for imaging the signal  
786 recovery. During the application of the bleaching module, the 488 laser was focused at an  
787 intensity of 5% and with a gain of 0.1% on to an area within the nucleus of each cell at maximum  
788 zoom for 20 seconds. Immediately afterwards, the first sequence was manually cancelled, the  
789 resolution was optimized, imaging area was restored to the whole cell for the second sequence.  
790 The laser power was set for optimal imaging level and images of the whole cell were acquired  
791 for 3 min circa at the rate of one image every 2.2 seconds.

792

#### 793 Intracellular staining for flow cytometry

794 Cell surface staining was performed in PBS, 1% BSA (Euromedex), 1mM EDTA (GIBCO),  
795 0.01% NaN<sub>3</sub> (AMRESCO) (FACS Buffer) at 4°C. Viability staining (Live-Dead) with Fixable  
796 Viability Dye eFluor 780 was performed in PBS at 4°C. Cells were resuspended in FACS  
797 Buffer prior to final acquisition. Intracellular staining of  $\gamma$ H2AX was performed using the  
798 FOXP3/Transcription Factor Staining Buffer Set (eBioscience) as per manufacturer's protocol.  
799 Cells were resuspended in FACS Buffer prior to final acquisition. All flow cytometry  
800 acquisitions were performed on the FACSVerse (BD) using the FACSSuite software (BD) and  
801 analyzed on FlowJo v10. The antibodies used are listed in **Table 4**.

802

### 803 Electron Microscopy

804 Cells were seeded at  $5 \times 10^4$  cells/well in a 24w plate onto sterile 12 mm glass coverslips  
805 (Thermo Scientific) and left to adhere overnight. The following morning, cells were washed in  
806 PBS and were fixed using 2% glutaraldehyde in 0.1 M cacodylate buffer, pH 7.4 for 1h, post  
807 fixed for 1h with 2% buffered osmium tetroxide, dehydrated in a graded series of ethanol  
808 solution, and then embedded in epoxy resin. Images were acquired with a digital 4k CCD  
809 camera Quemesa (EMSIS GmbH, Münster, Germany) mounted on a Tecnai Spirit transmission  
810 electron microscope (ThermoFisher, Eindhoven, The Netherlands) operated at 80kV.

811

### 812 Micropipette aspiration microscopy

813 Prior to harvest, HeLa cell lines were incubated with  $1\mu\text{M}$  SiR-DNA dye from Tebu Bio for  
814 1h30 at  $37^\circ\text{C}$  in cell culture medium. Cells were washed, harvested and resuspended at a  
815 concentration of  $5 \times 10^6$  cells/mL in sterile 3% BSA in PBS-0.2% FBS. Cells were subjected to  
816 the experimental conditions as described previously (Davidson et al., 2019).

817

### 818 Microarray Gene Expression (Affymetrix)

819 Total RNA was extracted from  $10^6$  HeLa cells using NucleoSpin RNA and adjusted to 50  
820 ng/ $\mu\text{L}$ . A WT PLUS amplification and labeling protocol was conducted with 100 ng of total  
821 RNA. Samples passed the quality control with a high score. The Affymetrix analysis was  
822 performed by the NGS platform at Institut Curie using the Human Gene 2.0 ST chip. Human  
823 Gene 2.0ST array were scanned using a Genechip 7G scanner, according to the supplier's  
824 protocol. Micro-array analyses were processed with R using packages from Bioconductor. The  
825 quality control was performed using ArrayQualityMetrics package without detecting any  
826 outlier among the experiment. Data was normalized using the Robust Multi-Array Average

827 algorithm from the Oligo package. Annotation of the probes was done using the hugene20  
828 annotation data (chip hugene20sttranscriptcluster) from Bioconductor. Differential gene-  
829 expression analysis was performed with Limma. The accession number for the raw data files is  
830 NCBI GEO: GSE162019.

831

### 832 Statistical Analysis

833 Statistical analyses were performed in Prism 7 or 8 (GraphPad Software) as indicated in the  
834 figure legends.

835

836

837 **Supplementary Tables**

838

839 **Table 1: Plasmids used in this study**

| <b>Plasmid Name</b>                                                           | <b>Purpose</b> | <b>Insert/<br/>Target/<br/>Componen<br/>ts</b> | <b>Reporter<br/>/<br/>Selection</b> | <b>Source or<br/>Identifier</b>                  |
|-------------------------------------------------------------------------------|----------------|------------------------------------------------|-------------------------------------|--------------------------------------------------|
| <b>pTRIP-SFFV-tagBFP-2A</b>                                                   | Overexpression | /                                              | BFP                                 | (Cerboni et al., 2017)                           |
| <b>pTRIP-SFFV-<br/>TagRFP657-2A</b>                                           | Overexpression | /                                              | RFP657                              | This study                                       |
| <b>pTRIP-SFFV-EGFP</b>                                                        | Overexpression | /                                              | GFP                                 | (Lahaye et al., 2016)                            |
| <b>pTRIP-CMV-EGFP-2A</b>                                                      | Overexpression | /                                              | GFP                                 |                                                  |
| <b>pTRIP-SFFV-tagBFP-<br/>2A-SUN1</b>                                         | Overexpression | SUN1                                           | BFP                                 | This study<br>(MGC cDNA<br>cloneID:<br>40148817) |
| <b>pTRIP-SFFV-tagBFP-<br/>2A-NtSUN2</b>                                       | Overexpression | SUN2                                           | BFP                                 | This study                                       |
| <b>pTRIP-SFFV-tagBFP-<br/>2A-SUN1 Dharmacon (1-<br/>298)-ntSUN2 (220-717)</b> | Overexpression | SUN1-<br>SUN2                                  | BFP                                 | This study                                       |

|                                                                                    |                |               |           |                                                 |
|------------------------------------------------------------------------------------|----------------|---------------|-----------|-------------------------------------------------|
| <b>pTRIP-SFFV-tagBFP-2A-NtSUN2 (1-219)-SUN1 Dharmacon (299-785)</b>                | Overexpression | SUN2-<br>SUN1 | BFP       | This study                                      |
| <b>pTRIP-SFFV-TagRFP657-2A-SUN1 Dharmacon</b>                                      | Overexpression | SUN1          | RFP657    | This study<br>(MGC cDNA<br>cloneID:<br>40148817 |
| <b>pTRIP-SFFV-TagRFP657-2A-ntSUN2</b>                                              | Overexpression | SUN2          | RFP657    | This Study                                      |
| <b>pTRIP-SFFV-EGFP-SR-KASH</b>                                                     | Overexpression | SR-KASH       | GFP       | This study                                      |
| <b>pLKO1puro-shLACZ<br/>shRNA sequence:<br/>GCGATCGTAATCACC<br/>CGAGTG</b>         | Knock-down     | LacZ          | Puromycin | pLKO.1 clone<br>ID<br>TRCN00000722<br>29        |
| <b>pLKO.1-Puro-LMNA<br/>sh2<br/>shRNA sequence:<br/>GAAGCAACTTCAGG<br/>ATGAGAT</b> | Knock-down     | Lamin A/C     | Puromycin | pLKO.1 clone<br>ID<br>TRCN00000618<br>35        |
| <b>pLKO.1-Puro-LMNB2<br/>sh5<br/>shRNA sequence:</b>                               | Knock-down     | Lamin B2      | Puromycin | pLKO.1 clone<br>ID<br>TRCN00000724<br>22        |

|                                        |                     |                                                            |               |                       |
|----------------------------------------|---------------------|------------------------------------------------------------|---------------|-----------------------|
| <b>CTACAAGTTCACGCC<br/>CAAGTA</b>      |                     |                                                            |               |                       |
| <b>pCMV-VSVG</b>                       | Expression          | VSV-G                                                      | /             | (Manel et al., 2010)  |
| <b>psPAX2</b>                          | Packaging<br>vector | /                                                          | /             | (Manel et al., 2010)  |
| <b>HIVGFP<br/>(NL4-3 strain)</b>       | Infection           | Vif-, Vpr-,<br>Vpu-, Env-,<br>Nef-                         | GFP in<br>Nef | (Manel et al., 2010)  |
| <b>HIVGFP N74D</b>                     | Infection           | Vif-, Vpr-,<br>Vpu-, Env-,<br>Nef-, CA<br>mutation<br>N74D | GFP in<br>Nef | (Lahaye et al., 2016) |
| <b>HIVGFP env-nef-</b>                 | Infection           | Vif+, Vpr+,<br>Vpu+, Env-,<br>Nef-                         | GFP in<br>Nef | This study            |
| <b>HIVGFP env- nef- vpr-</b>           | Infection           | Vif+, Vpr-,<br>Vpu+, Env-,<br>Nef-                         | GFP in<br>Nef | This study            |
| <b>HIV-mTagBFP2<br/>(NL4-3 strain)</b> | Infection           | Vif-, Vpr-,<br>Vpu-, Env-,<br>Nef-                         | BFP in<br>Nef | This study            |

|                                                                   |                |                                    |               |                           |
|-------------------------------------------------------------------|----------------|------------------------------------|---------------|---------------------------|
| <b>HIV-2 ROD9 <math>\Delta env\Delta nef</math><br/>mTagBFP2+</b> | Infection      | Vif+, Vpr+,<br>Vpx+, Env-,<br>Nef- | BFP in<br>Nef | This study                |
| <b>HIV-2 ROD9 <math>\Delta env\Delta nef</math><br/>GFP</b>       | Infection      | Vif+, Vpr+,<br>Vpx+, Env-,<br>Nef- | GFP in<br>Nef | (Manel et al.,<br>2010)   |
| <b>pSIV3+</b>                                                     | Helper plasmid |                                    | /             | (Mangeot et al.,<br>2000) |

840

841 Table 2: Drugs used in cell culture in this study

| <b>Name</b>          | <b>Description</b>                    | <b>Cat. Reference</b> | <b>Company</b> | <b>Final Concentration</b> |
|----------------------|---------------------------------------|-----------------------|----------------|----------------------------|
| <b>Cyclosporin A</b> | Inhibits CypA-<br>CA interaction      | S2286                 | Selleckchem    | 2 $\mu$ M                  |
| <b>AZT</b>           | Reverse<br>transcriptase<br>inhibitor | A2169                 | Sigma          | 24 $\mu$ M                 |
| <b>NVP</b>           | Reverse<br>transcriptase<br>inhibitor | SML0097               | Sigma          | 10 $\mu$ M                 |
| <b>Etoposide</b>     | Topoisomerase<br>II inhibitor         | E1383                 | Sigma          | 5, 50 or 500 $\mu$ M       |
| <b>Q-VD-Oph</b>      | Pan-caspase<br>inhibitor              | S7311                 | Selleckchem    | 50 $\mu$ M                 |
| <b>AZD6738</b>       | ATR inhibitor                         | S7693                 | Selleckchem    | 1 $\mu$ M                  |



|             |         |         |                  |          |
|-------------|---------|---------|------------------|----------|
| <b>DMSO</b> | Diluent | BDH1115 | VWR<br>Chemicals | adjusted |
|-------------|---------|---------|------------------|----------|

842

843

844 Table 3: Primers used for HIV DNA species Real Time Quantitative PCR

| <b>Strain</b> | <b>Amplification</b>      | <b>Primer name</b>    | <b>Sequence</b>                 | <b>Annealing</b> |
|---------------|---------------------------|-----------------------|---------------------------------|------------------|
| <b>Human</b>  | Beta-globin               | bglobin<br>-f         | CCCTTGGACCCAGAGGTTCT            | 50°C             |
| <b>Human</b>  | Beta-globin               | bglobin<br>-r         | CGAGCACTTTCTTGCCATGA            | 50°C             |
| <b>HIV-1</b>  | Total DNA<br>(Late RT)    | hiv1-<br>3'U3-<br>fwd | GCATGGAATGGATGACCCTGAGA         | 65°C             |
| <b>HIV-1</b>  | Total DNA<br>(Late RT)    | hiv1-<br>psi-rev2     | CGTCGAGAGATCTCCTCT<br>GGCTTTA   | 65°C             |
| <b>HIV-1</b>  | 2-LTR circles             | Junct4 -<br>fwd       | CAGTGTGGAAAATCTCTA<br>GCAGTACTG | 65°C             |
| <b>HIV-1</b>  | 2-LTR circles             | hiv1-<br>psi-rev2     | CGTCGAGAGATCTCCTCT<br>GGCTTTA   | 65°C             |
| <b>HIV-1</b>  | Integrated<br>DNA round 1 | alu1                  | GCCTCCCAAAGTGCT<br>GGGATTACAG   | 65°C             |
| <b>HIV-1</b>  | Integrated<br>DNA round 1 | hiv1-<br>psi-rev2     | CGTCGAGAGATCTCCTCT<br>GGCTTTA   | 65°C             |

|              |                           |                       |                               |      |
|--------------|---------------------------|-----------------------|-------------------------------|------|
| <b>HIV-1</b> | Integrated<br>DNA round 2 | hiv1-f2               | CTGGGAGCTCTCTGGCTAACTA        | 65°C |
| <b>HIV-1</b> | Integrated<br>DNA round 2 | hiv1-r2               | AACAGACGGGCACACACTACTT        | 65°C |
| <b>HIV-2</b> | Total DNA<br>(Late RT)    | hiv2-<br>3'U3-<br>fwd | GAAGGGATGTTTT<br>ACCATTTAGTTA | 65°C |
| <b>HIV-2</b> | Total DNA<br>(Late RT)    | hiv2-<br>psi-rev      | GTTCCAAGACTTCTCAGTCTTCTT<br>C | 65°C |
| <b>HIV-2</b> | 2-LTR circles             | hiv2-R-<br>fwd        | GTTCTCTCCAGCACTAGCAGGTA       | 65°C |
| <b>HIV-2</b> | 2-LTR circles             | hiv2-<br>3'U3-<br>rev | TAACTAAATGGTA<br>AAACATCCCTTC | 65°C |
| <b>HIV-2</b> | Integrated<br>DNA round 1 | alu1                  | GCCTCCCAAAGTGCT<br>GGGATTACAG | 65°C |
| <b>HIV-2</b> | Integrated<br>DNA round 1 | hiv2-r1               | AAGGGTCCTAACAGACCAGGGTC<br>T  | 65°C |
| <b>HIV-2</b> | Integrated<br>DNA round 2 | hiv2-f2               | GCAGGTAGAGCCTGGGTGTTC         | 65°C |
| <b>HIV-2</b> | Integrated<br>DNA round 2 | hiv2-r2               | CAGGCGGCGACTAGGAGAGAT         | 65°C |

845

846

847 Table 4: Antibodies used in this study for Western Blot, Confocal Imaging and Flow

848 Cytometry

| <b>Antibody target</b>                                    | <b>Cat. Reference</b>   | <b>Company</b>   | <b>Application</b>                    |
|-----------------------------------------------------------|-------------------------|------------------|---------------------------------------|
| <b>Actin</b>                                              | MAB1501<br>Clone C4     | Sigma            | WB (1:5000)                           |
| <b>Vinculin</b>                                           | V9264                   | Sigma            | WB (1:5000)                           |
| <b>SUN1</b>                                               | ab124770                | Abcam            | WB (1:1000)                           |
| <b>SUN2</b>                                               | HPA001209               | Atlas antibodies | WB (1:1000)                           |
| <b>SUN2</b>                                               | ABT272                  | Millipore        | WB (1:1000)                           |
| <b>Lamin A/C</b>                                          | SAB4200236              | Sigma            | WB (1:1000)                           |
| <b>Lamin B2</b>                                           | ab8983<br>clone LN43    | Abcam            | WB (1:1000)                           |
| <b>NUP153</b>                                             | HPA027896               | Sigma            | IF (1:50)                             |
| <b>SiR-DNA staining</b>                                   | SC007                   | Tebu Bio         | Live imaging (1 $\mu$ M)              |
| <b>H2AX p-S139</b>                                        | 562377<br>Clone N1-431  | BD               | Coupled to PE;<br>FACS (1:100)        |
| <b>Mouse IgG1 <math>\kappa</math><br/>isotype control</b> | 554680<br>Clone MOPC-21 | BD               | Coupled to PE;<br>FACS (1:100)        |
| <b>Rabbit-IgG (H+L)</b>                                   | A-11010                 | Invitrogen       | Alexa Fluor 546 for<br>IF (1:200)     |
| <b>Rabbit-IgG</b>                                         | 7074S                   | Ozyme            | Conjugated to HRP<br>for WB (1:10000) |
| <b>Mouse IgG</b>                                          | 7076S                   | Ozyme            | Conjugated to HRP<br>for WB (1:10000) |

849

## 850 References

- 851 Ariumi, Y., Turelli, P., Masutani, M., and Trono, D. (2005). DNA Damage Sensors ATM,  
852 ATR, DNA-PKcs, and PARP-1 Are Dispensable for Human Immunodeficiency Virus Type 1  
853 Integration. *J. Virol.* *79*, 2973–2978.
- 854 Bhargava, A., Lahaye, X., and Manel, N. (2018). Let me in: Control of HIV nuclear entry at  
855 the nuclear envelope. *Cytokine Growth Factor Rev.* *40*, 59–67.
- 856 Braaten, D., and Luban, J. (2001). Cyclophilin A regulates HIV-1 infectivity, as demonstrated  
857 by gene targeting in human T cells. *EMBO J* *20*, 1300–1309.
- 858 Burke, B., and Stewart, C.L. (2013). The nuclear lamins: flexibility in function. *Nat. Rev.*  
859 *Mol. Cell Biol.* *14*, 13–24.
- 860 Cerboni, S., Jeremiah, N., Gentili, M., Gehrman, U., Conrad, C., Stolzenberg, M.C., Picard,  
861 C., Neven, B., Fischer, A., Amigorena, S., et al. (2017). Intrinsic antiproliferative activity of  
862 the innate sensor STING in T lymphocytes. *J Exp Med.*
- 863 Davidson, P.M., Fedorchak, G.R., Mondésert-Deveraux, S., Bell, E.S., Isermann, P., Aubry,  
864 D., Allena, R., and Lammerding, J. (2019). High-throughput microfluidic micropipette  
865 aspiration device to probe time-scale dependent nuclear mechanics in intact cells. *Lab. Chip*  
866 *19*, 3652–3663.
- 867 De Iaco, A., and Luban, J. (2014). Cyclophilin A promotes HIV-1 reverse transcription but its  
868 effect on transduction correlates best with its effect on nuclear entry of viral cDNA.  
869 *Retrovirology* *11*, 11.
- 870 DeHart, J.L., Andersen, J.L., Zimmerman, E.S., Ardon, O., An, D.S., Blackett, J., Kim, B.,  
871 and Planelles, V. (2005). The Ataxia Telangiectasia-Mutated and Rad3-Related Protein Is  
872 Dispensable for Retroviral Integration. *J. Virol.* *79*, 1389–1396.
- 873 Dharan, A., Bachmann, N., Talley, S., Zwickelmaier, V., and Campbell, E.M. (2020). Nuclear  
874 pore blockade reveals that HIV-1 completes reverse transcription and uncoating in the  
875 nucleus. *Nat. Microbiol.* *5*, 1088–1095.
- 876 Donahue, D.A., Amraoui, S., di Nunzio, F., Kieffer, C., Porrot, F., Opp, S., Diaz-Griffero, F.,  
877 Casartelli, N., and Schwartz, O. (2016). SUN2 Overexpression Deforms Nuclear Shape and  
878 Inhibits HIV. *J. Virol.* *90*, 4199–4214.
- 879 Donahue, D.A., Porrot, F., Couespel, N., and Schwartz, O. (2017). SUN2 Silencing Impairs  
880 CD4 T Cell Proliferation and Alters Sensitivity to HIV-1 Infection Independently of  
881 Cyclophilin A. *J. Virol.* *91*.
- 882 Ebina, H., Kanemura, Y., Suzuki, Y., Urata, K., Misawa, N., and Koyanagi, Y. (2012).  
883 Integrase-independent HIV-1 infection is augmented under conditions of DNA damage and  
884 produces a viral reservoir. *Virology* *427*, 44–50.
- 885 Foote, K.M., Nissink, J.W.M., McGuire, T., Turner, P., Guichard, S., Yates, J.W.T., Lau, A.,  
886 Blades, K., Heathcote, D., Odedra, R., et al. (2018). Discovery and Characterization of  
887 AZD6738, a Potent Inhibitor of Ataxia Telangiectasia Mutated and Rad3 Related (ATR)  
888 Kinase with Application as an Anticancer Agent. *J. Med. Chem.* *61*, 9889–9907.
- 889 Goh, W.C., Rogel, M.E., Kinsey, C.M., Michael, S.F., Fultz, P.N., Nowak, M.A., Hahn, B.H.,  
890 and Emerman, M. (1998). HIV-1 Vpr increases viral expression by manipulation of the cell  
891 cycle: a mechanism for selection of Vpr in vivo. *Nat. Med.* *4*, 65–71.
- 892 Gonzalo, S. (2014). DNA Damage and Lamins. In *Cancer Biology and the Nuclear Envelope*,

- 893 E.C. Schirmer, and J.I. de las Heras, eds. (New York, NY: Springer New York), pp. 377–399.
- 894 Ji, J.Y., Lee, R.T., Vergnes, L., Fong, L.G., Stewart, C.L., Reue, K., Young, S.G., Zhang, Q.,  
895 Shanahan, C.M., and Lammerding, J. (2007). Cell Nuclei Spin in the Absence of Lamin B1. *J.*  
896 *Biol. Chem.* *282*, 20015–20026.
- 897 Kidiyoor, G.R., Li, Q., Bastianello, G., Bruhn, C., Giovannetti, I., Mohamood, A.,  
898 Beznoussenko, G.V., Mironov, A., Raab, M., Piel, M., et al. (2020). ATR is essential for  
899 preservation of cell mechanics and nuclear integrity during interstitial migration. *Nat.*  
900 *Commun.* *11*, 4828.
- 901 Koyama, T., Sun, B., Tokunaga, K., Tatsumi, M., and Ishizaka, Y. (2013). DNA damage  
902 enhances integration of HIV-1 into macrophages by overcoming integrase inhibition.  
903 *Retrovirology* *10*, 21.
- 904 Kumar, A., Mazzanti, M., Mistrik, M., Kosar, M., Beznoussenko, G.V., Mironov, A.A.,  
905 Garrè, M., Parazzoli, D., Shivashankar, G.V., Scita, G., et al. (2014). ATR mediates a  
906 checkpoint at the nuclear envelope in response to mechanical stress. *Cell* *158*, 633–646.
- 907 Lahaye, X., Satoh, T., Gentili, M., Cerboni, S., Conrad, C., Hurbain, I., El Marjou, A.,  
908 Lacabaratz, C., Lelievre, J.D., and Manel, N. (2013). The capsids of HIV-1 and HIV-2  
909 determine immune detection of the viral cDNA by the innate sensor cGAS in dendritic cells.  
910 *Immunity* *39*, 1132–1142.
- 911 Lahaye, X., Satoh, T., Gentili, M., Cerboni, S., Silvin, A., Conrad, C., Ahmed-Belkacem, A.,  
912 Rodriguez, E.C., Guichou, J.-F., Bosquet, N., et al. (2016). Nuclear Envelope Protein SUN2  
913 Promotes Cyclophilin-A-Dependent Steps of HIV Replication. *Cell Rep.* *15*, 879–892.
- 914 Lammerding, J., Schulze, P.C., Takahashi, T., Kozlov, S., Sullivan, T., Kamm, R.D., Stewart,  
915 C.L., and Lee, R.T. (2004). Lamin A/C deficiency causes defective nuclear mechanics and  
916 mechanotransduction. *J. Clin. Invest.* *113*, 370–378.
- 917 Lawrence, K.S., Tapley, E.C., Cruz, V.E., Li, Q., Aung, K., Hart, K.C., Schwartz, T.U., Starr,  
918 D.A., and Engebrecht, J. (2016). LINC complexes promote homologous recombination in part  
919 through inhibition of nonhomologous end joining. *J. Cell Biol.* *215*, 801–821.
- 920 Lei, K., Zhang, X., Ding, X., Guo, X., Chen, M., Zhu, B., Xu, T., Zhuang, Y., Xu, R., and  
921 Han, M. (2009). SUN1 and SUN2 play critical but partially redundant roles in anchoring  
922 nuclei in skeletal muscle cells in mice. *Proc Natl Acad Sci U S A* *106*, 10207–10212.
- 923 Lei, K., Zhu, X., Xu, R., Shao, C., Xu, T., Zhuang, Y., and Han, M. (2012). Inner nuclear  
924 envelope proteins SUN1 and SUN2 play a prominent role in the DNA damage response. *Curr*  
925 *Biol* *22*, 1609–1615.
- 926 Liu, Q., Pante, N., Misteli, T., Elsagga, M., Crisp, M., Hodzic, D., Burke, B., and Roux, K.J.  
927 (2007). Functional association of Sun1 with nuclear pore complexes. *J Cell Biol* *178*, 785–  
928 798.
- 929 Lottersberger, F., Karssemeijer, R.A., Dimitrova, N., and de Lange, T. (2015). 53BP1 and the  
930 LINC Complex Promote Microtubule-Dependent DSB Mobility and DNA Repair. *Cell* *163*,  
931 880–893.
- 932 Luo, X., Yang, W., and Gao, G. (2018). SUN1 Regulates HIV-1 Nuclear Import in a Manner  
933 Dependent on the Interaction between the Viral Capsid and Cellular Cyclophilin A. *J. Virol.*  
934 *92*, e00229-18.
- 935 Manel, N., Hogstad, B., Wang, Y., Levy, D.E., Unutmaz, D., and Littman, D.R. (2010). A  
936 cryptic sensor for HIV-1 activates antiviral innate immunity in dendritic cells. *Nature* *467*,

- 937 214–217.
- 938 Mangeot, P.E., Negre, D., Dubois, B., Winter, A.J., Leissner, P., Mehtali, M., Kaiserlian, D.,  
939 Cosset, F.L., and Darlix, J.L. (2000). Development of minimal lentivirus vectors derived from  
940 simian immunodeficiency virus (SIVmac251) and their use for gene transfer into human  
941 dendritic cells. *J Virol* *74*, 8307–8315.
- 942 Mlcochova, P., Caswell, S.J., Taylor, I.A., Towers, G.J., and Gupta, R.K. (2018). DNA  
943 damage induced by topoisomerase inhibitors activates SAMHD1 and blocks HIV-1 infection  
944 of macrophages. *EMBO J.* *37*, 50–62.
- 945 de Noronha, C.M., Sherman, M.P., Lin, H.W., Cavrois, M.V., Moir, R.D., Goldman, R.D.,  
946 and Greene, W.C. (2001). Dynamic disruptions in nuclear envelope architecture and integrity  
947 induced by HIV-1 Vpr. *Science* *294*, 1105–1108.
- 948 Oza, P., Jaspersen, S.L., Miele, A., Dekker, J., and Peterson, C.L. (2009). Mechanisms that  
949 regulate localization of a DNA double-strand break to the nuclear periphery. *Genes Dev.* *23*,  
950 912–927.
- 951 Procter, D.J., Banerjee, A., Nukui, M., Kruse, K., Gaponenko, V., Murphy, E.A., Komarova,  
952 Y., and Walsh, D. (2018). The HCMV Assembly Compartment Is a Dynamic Golgi-Derived  
953 MTOC that Controls Nuclear Rotation and Virus Spread. *Dev. Cell* *45*, 83-100.e7.
- 954 Ranade, D., Pradhan, R., Jayakrishnan, M., Hegde, S., and Sengupta, K. (2019). Lamin A/C  
955 and Emerin depletion impacts chromatin organization and dynamics in the interphase nucleus.  
956 *BMC Mol. Cell Biol.* *20*, 11.
- 957 Rello-Varona, S., Gámez, A., Moreno, V., Stockert, J.C., Cristóbal, J., Pacheco, M., Cañete,  
958 M., Juarranz, Á., and Villanueva, Á. (2006). Metaphase arrest and cell death induced by  
959 etoposide on HeLa cells. *Int. J. Biochem. Cell Biol.* *38*, 2183–2195.
- 960 Roshal, M., Kim, B., Zhu, Y., Nghiem, P., and Planelles, V. (2003). Activation of the ATR-  
961 mediated DNA Damage Response by the HIV-1 Viral Protein R. *J. Biol. Chem.* *278*, 25879–  
962 25886.
- 963 Schaller, T., Ocwieja, K.E., Rasaiyaah, J., Price, A.J., Brady, T.L., Roth, S.L., Hué, S.,  
964 Fletcher, A.J., Lee, K., KewalRamani, V.N., et al. (2011). HIV-1 Capsid-Cyclophilin  
965 Interactions Determine Nuclear Import Pathway, Integration Targeting and Replication  
966 Efficiency. *PLoS Pathog.* *7*, e1002439.
- 967 Schaller, T., Bulli, L., Pollpeter, D., Betancor, G., Kutzner, J., Apolonia, L., Herold, N., Burk,  
968 R., and Malim, M.H. (2017). Effects of Inner Nuclear Membrane Proteins SUN1/UNC-84A  
969 and SUN2/UNC-84B on the Early Steps of HIV-1 Infection. *J. Virol.* *91*, e00463-17, e00463-  
970 17.
- 971 Schindelin, J., Arganda-Carreras, I., Frise, E., Kaynig, V., Longair, M., Pietzsch, T.,  
972 Preibisch, S., Rueden, C., Saalfeld, S., Schmid, B., et al. (2012). Fiji: an open-source platform  
973 for biological-image analysis. *Nat Methods* *9*, 676–682.
- 974 Schoggins, J.W., Wilson, S.J., Panis, M., Murphy, M.Y., Jones, C.T., Bieniasz, P., and Rice,  
975 C.M. (2011). A diverse range of gene products are effectors of the type I interferon antiviral  
976 response. *Nature* *472*, 481–485.
- 977 Singh, M., Hunt, C.R., Pandita, R.K., Kumar, R., Yang, C.-R., Horikoshi, N., Bachoo, R.,  
978 Serag, S., Story, M.D., Shay, J.W., et al. (2013). Lamin A/C depletion enhances DNA  
979 damage-induced stalled replication fork arrest. *Mol. Cell. Biol.* *33*, 1210–1222.
- 980 Starr, T.K., Jameson, S.C., and Hogquist, K.A. (2003). Positive and negative selection of T

- 981 cells. *Annu Rev Immunol* 21, 139–176.
- 982 Sun, W.-W., Jiao, S., Sun, L., Zhou, Z., Jin, X., and Wang, J.-H. (2018). SUN2 Modulates  
983 HIV-1 Infection and Latency through Association with Lamin A/C To Maintain the  
984 Repressive Chromatin. *MBio* 9, e02408-17, /mbio/9/3/mBio.02408-17.atom.
- 985 Tseng, Q., Duchemin-Pelletier, E., Deshiere, A., Balland, M., Guillou, H., Filhol, O., and  
986 Thery, M. (2012). Spatial organization of the extracellular matrix regulates cell-cell junction  
987 positioning. *Proc. Natl. Acad. Sci.* 109, 1506–1511.
- 988 Yamashita, M., and Engelman, A.N. (2017). Capsid-Dependent Host Factors in HIV-1  
989 Infection. *Trends Microbiol.* 25, 741–755.
- 990 Zhu, R., Antoku, S., and Gundersen, G.G. (2017). Centrifugal Displacement of Nuclei  
991 Reveals Multiple LINC Complex Mechanisms for Homeostatic Nuclear Positioning. *Curr.*  
992 *Biol. CB* 27, 3097-3110.e5.
- 993 Zimmerman, E.S., Sherman, M.P., Blackett, J.L., Neidleman, J.A., Kreis, C., Mundt, P.,  
994 Williams, S.A., Warmerdam, M., Kahn, J., Hecht, F.M., et al. (2006). Human  
995 immunodeficiency virus type 1 Vpr induces DNA replication stress in vitro and in vivo. *J.*  
996 *Viro.* 80, 10407–10418.
- 997
- 998

**Figure 1**

**A**

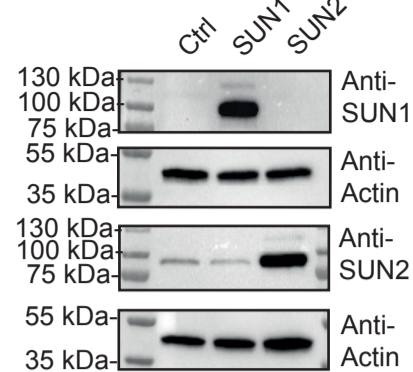

**B**

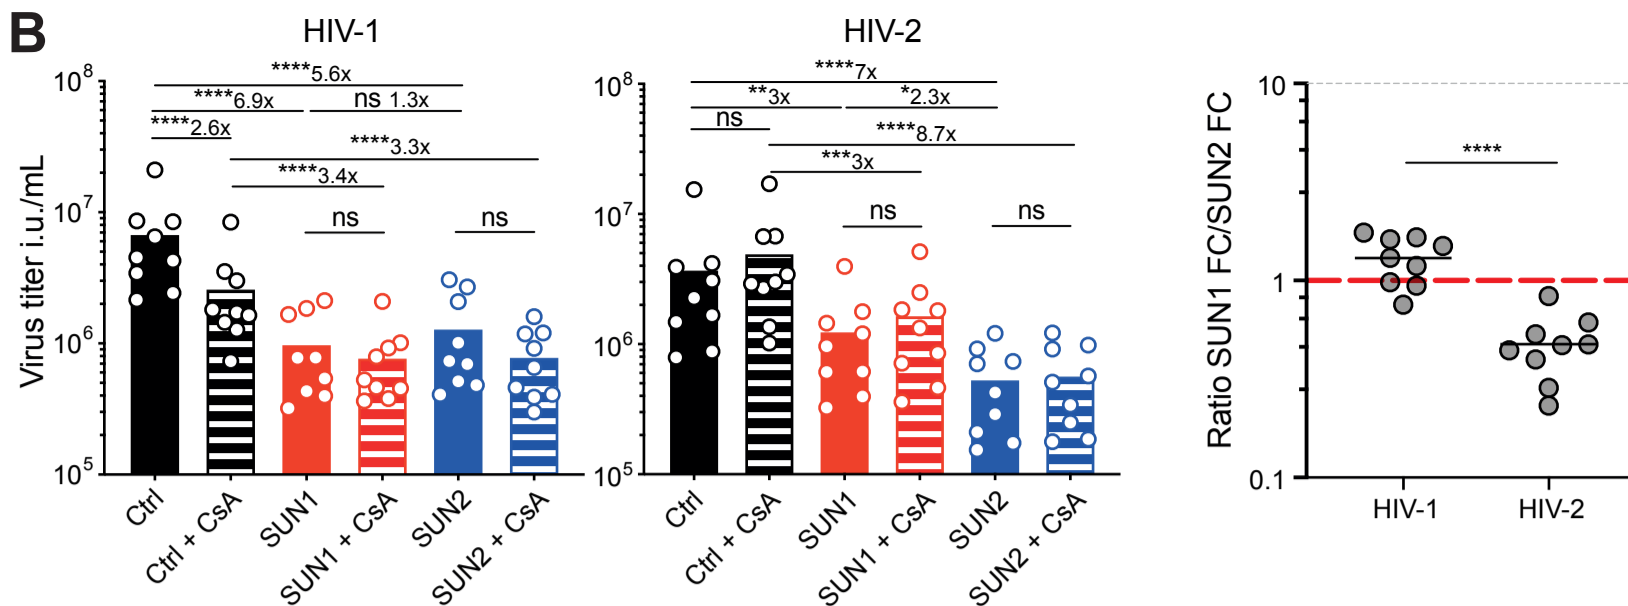

**C**

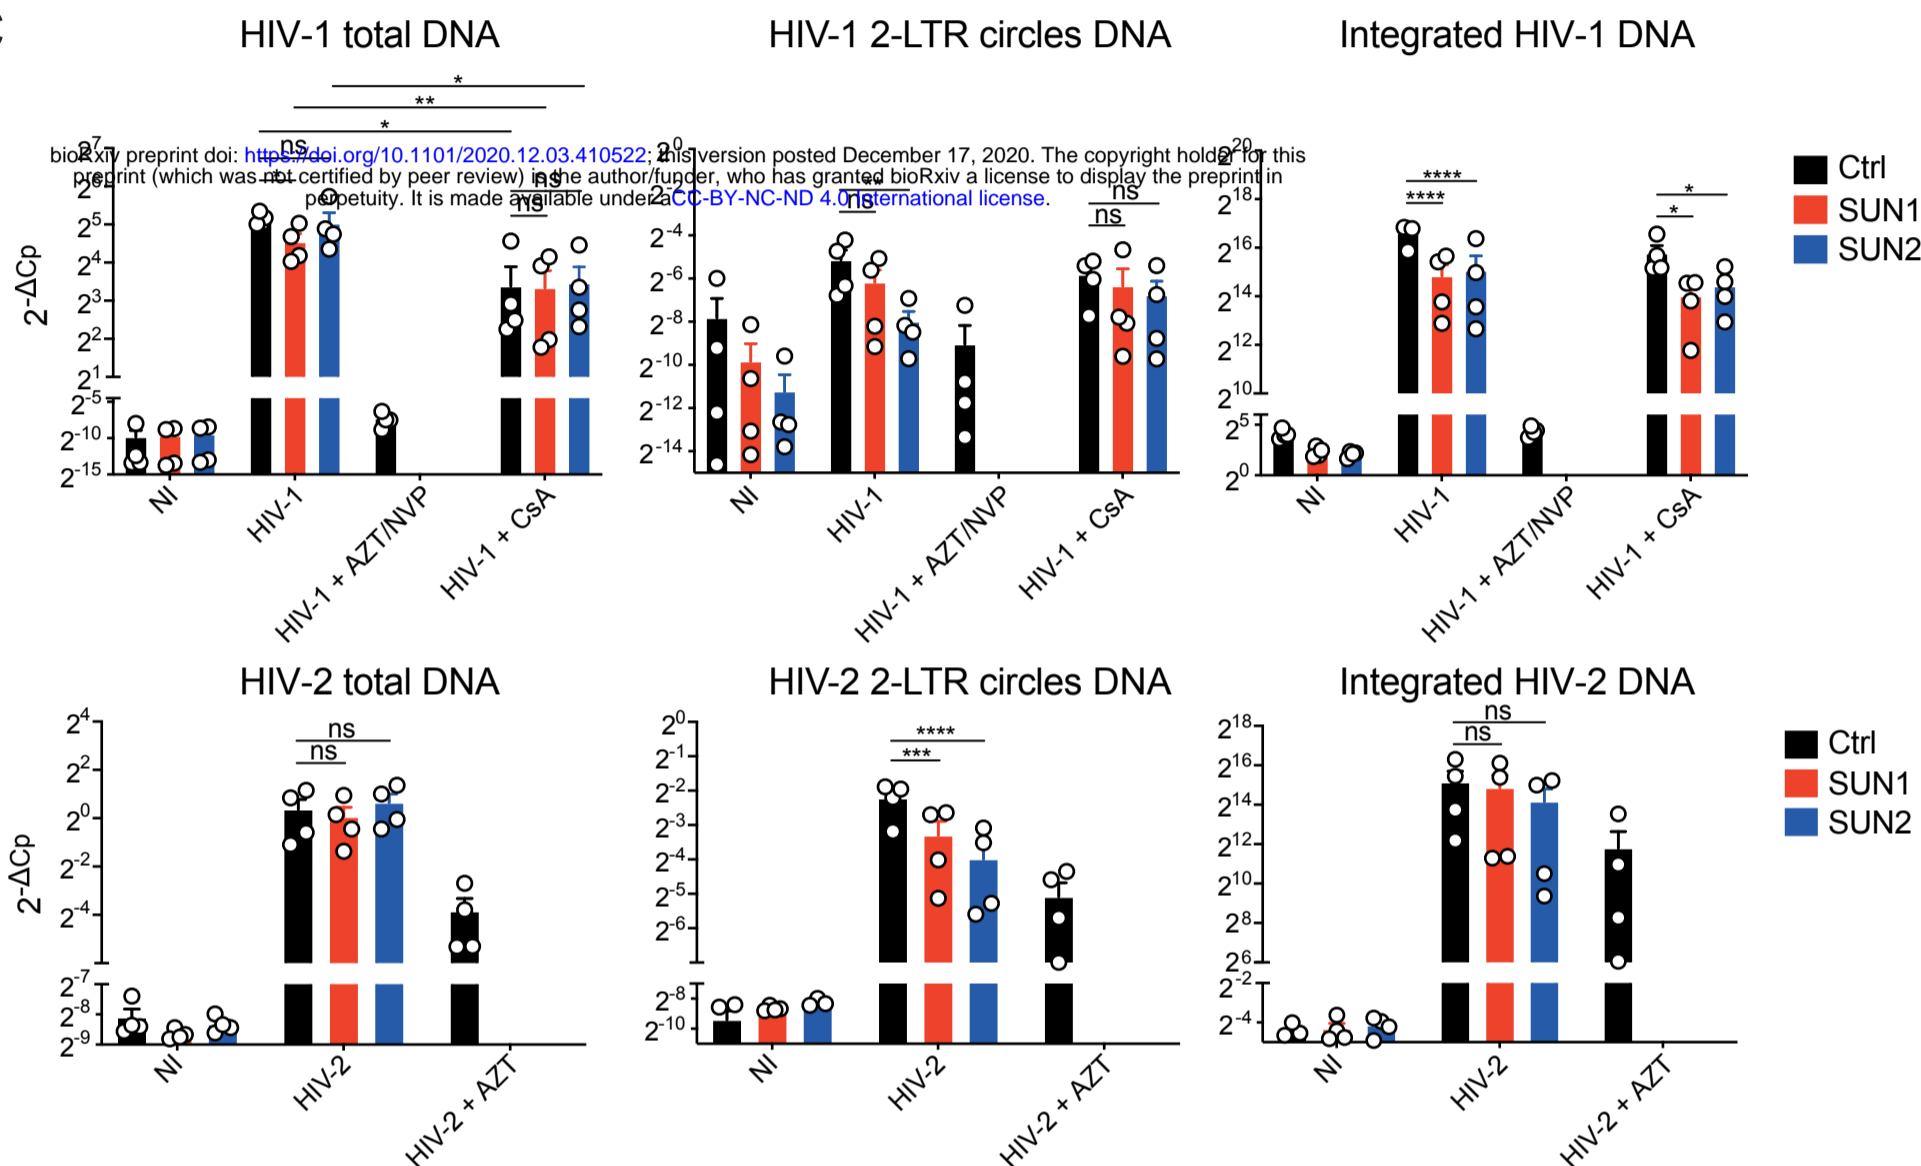

**D**

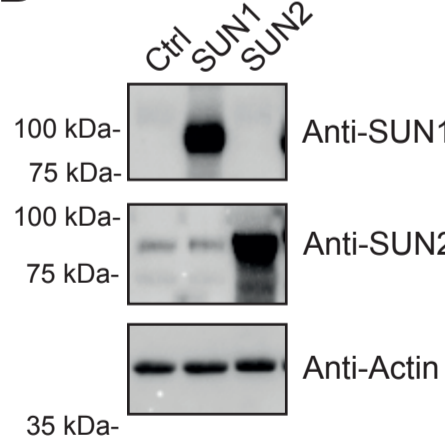

**E**

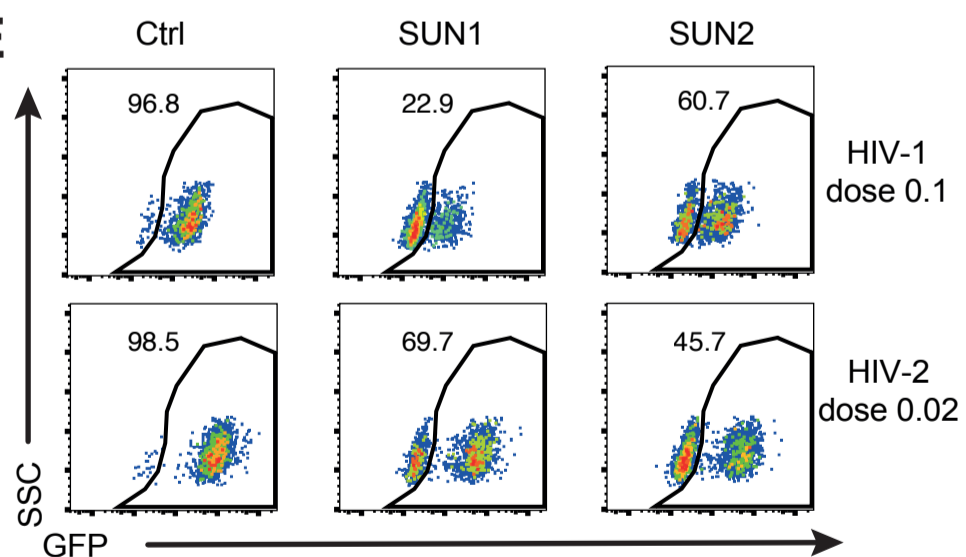

**F**

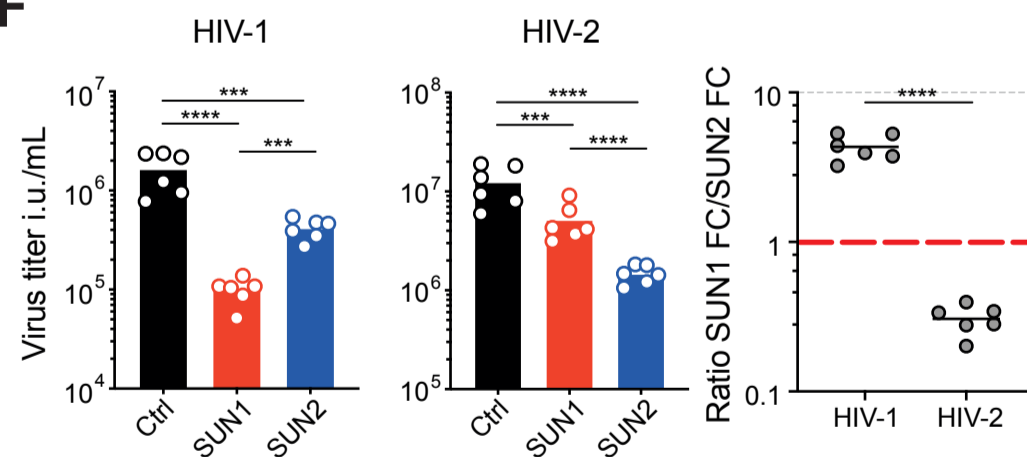

**G**

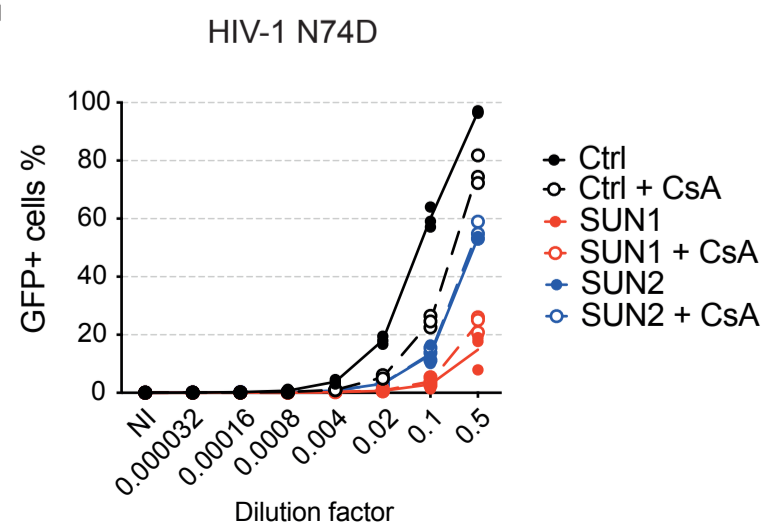

**H**

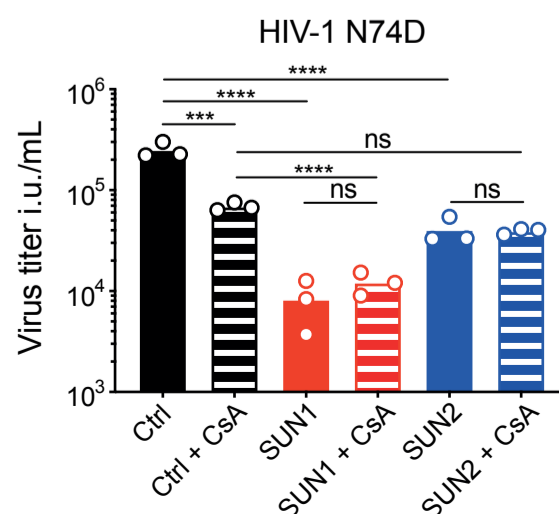



**Figure 2**

bioRxiv preprint doi: <https://doi.org/10.1101/2020.12.03.410522>; this version posted December 17, 2020. The copyright holder for this preprint (which was not certified by peer review) is the author/funder, who has granted bioRxiv a license to display the preprint in perpetuity. It is made available under aCC-BY-NC-ND 4.0 International license.

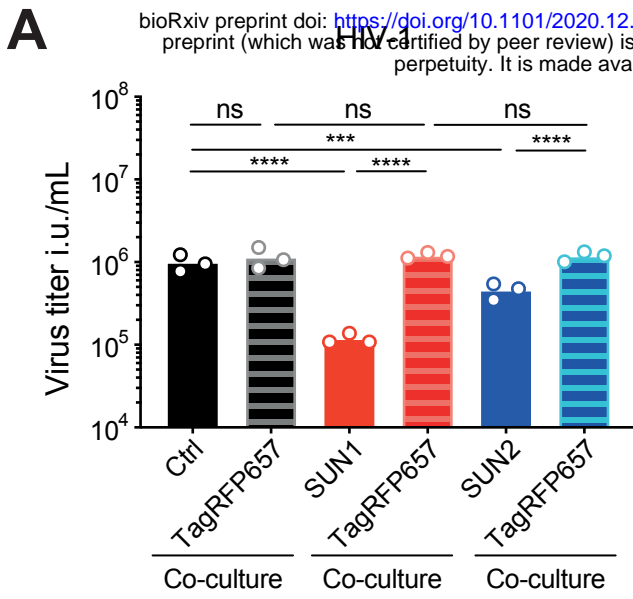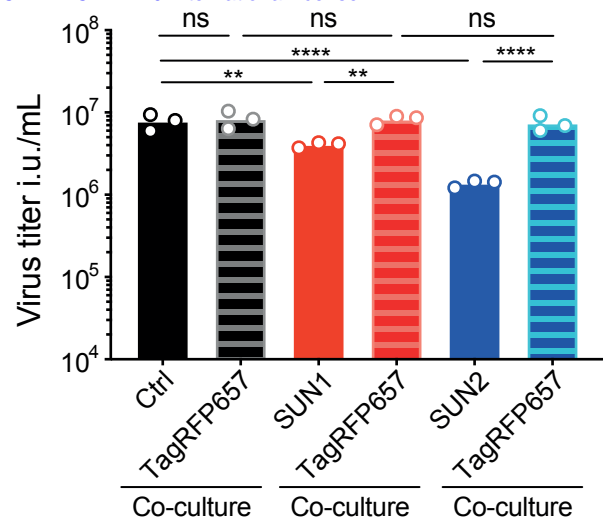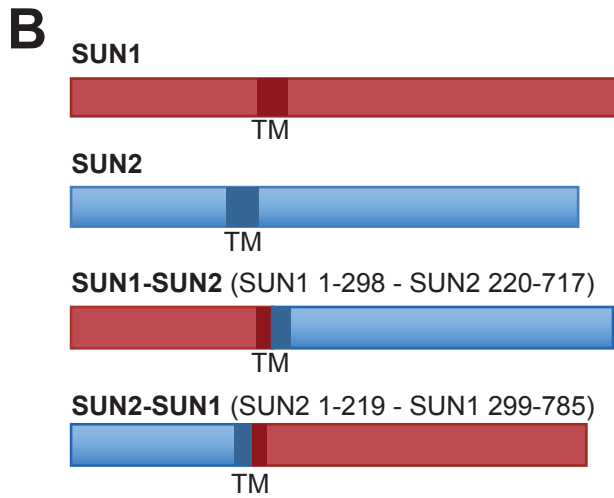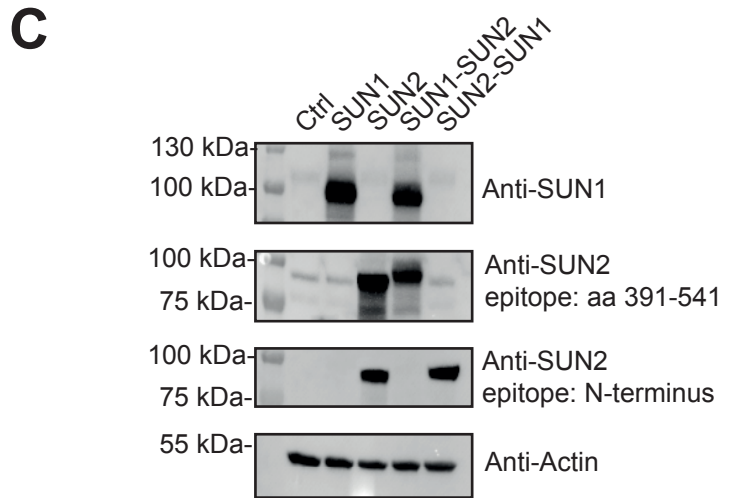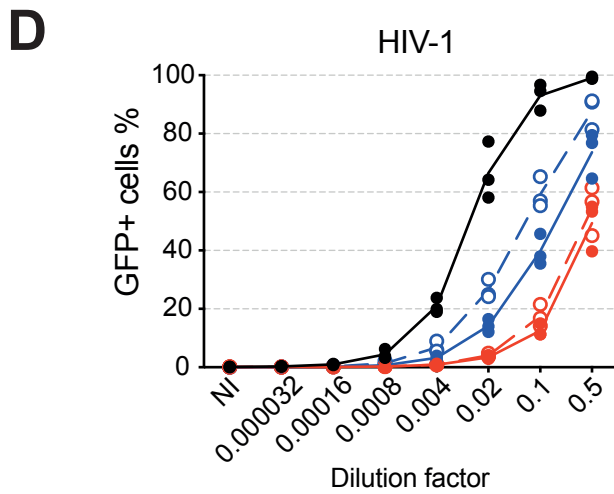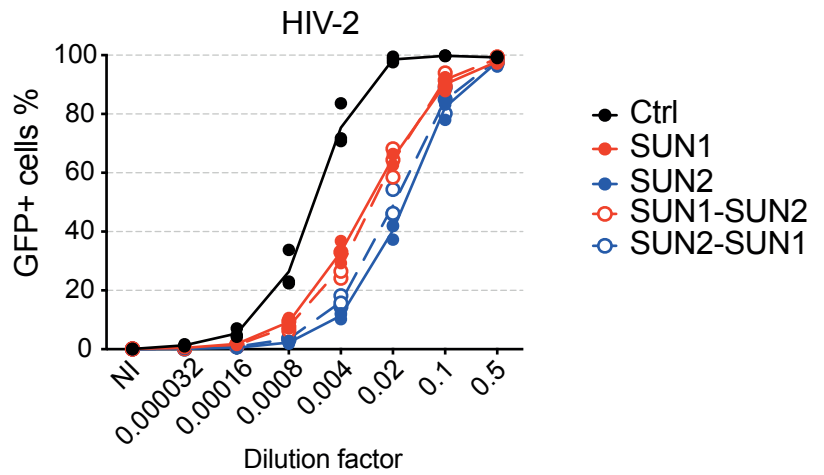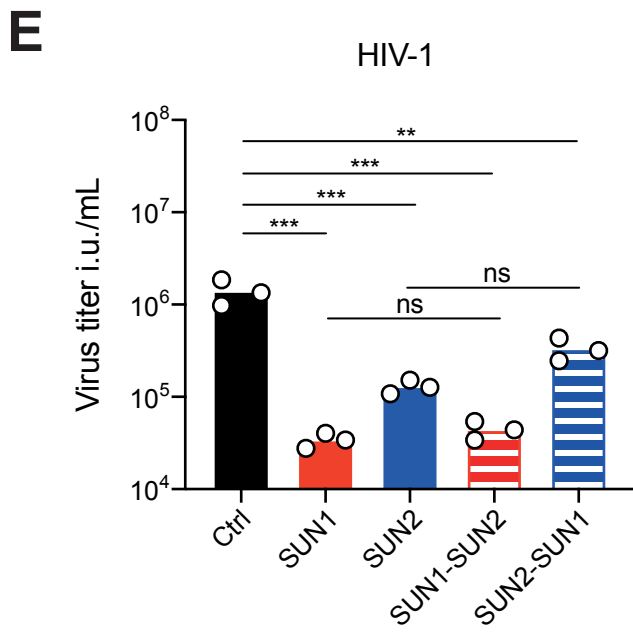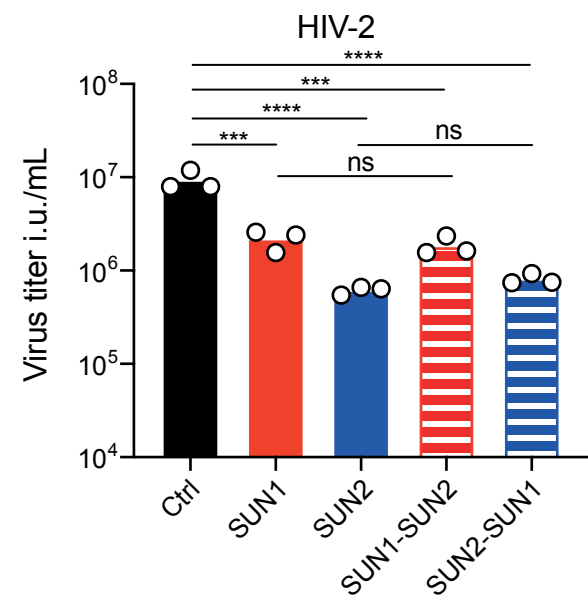

**Figure 3**

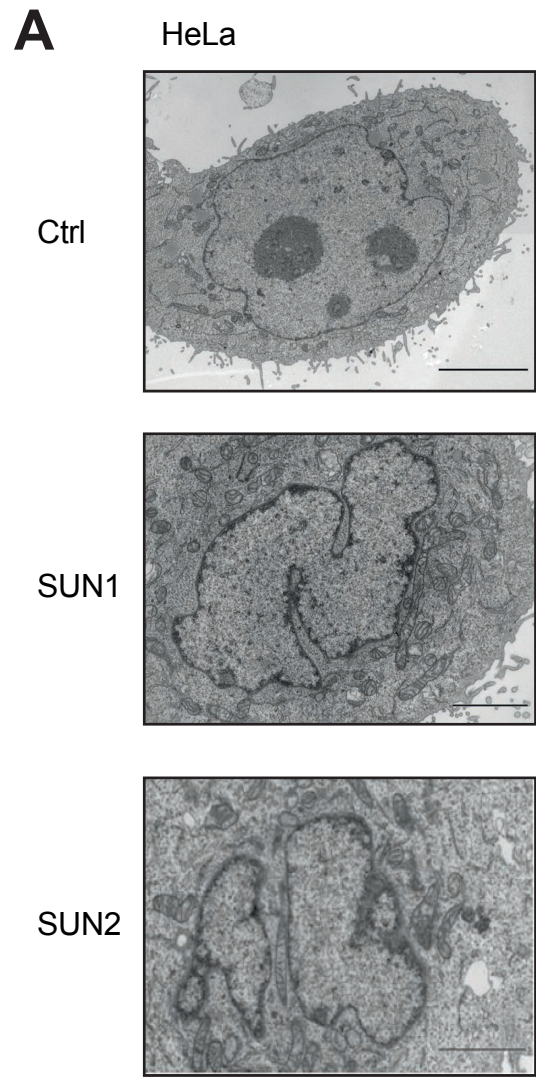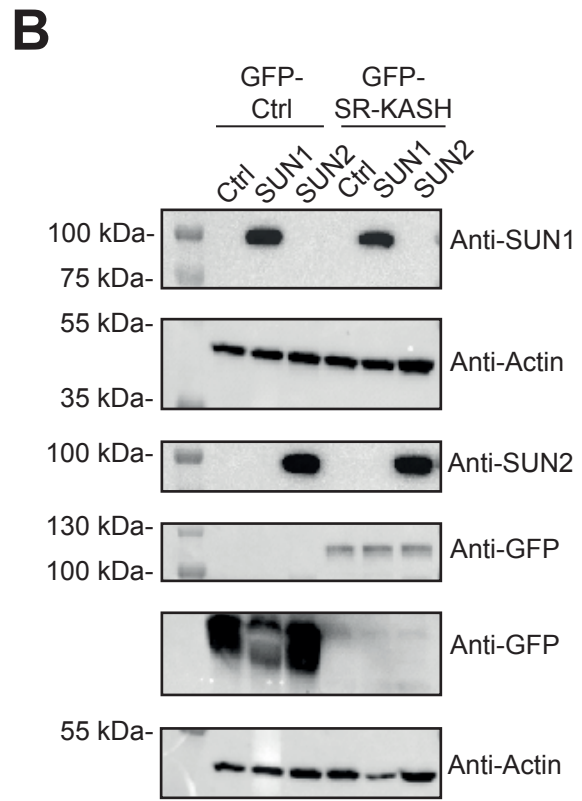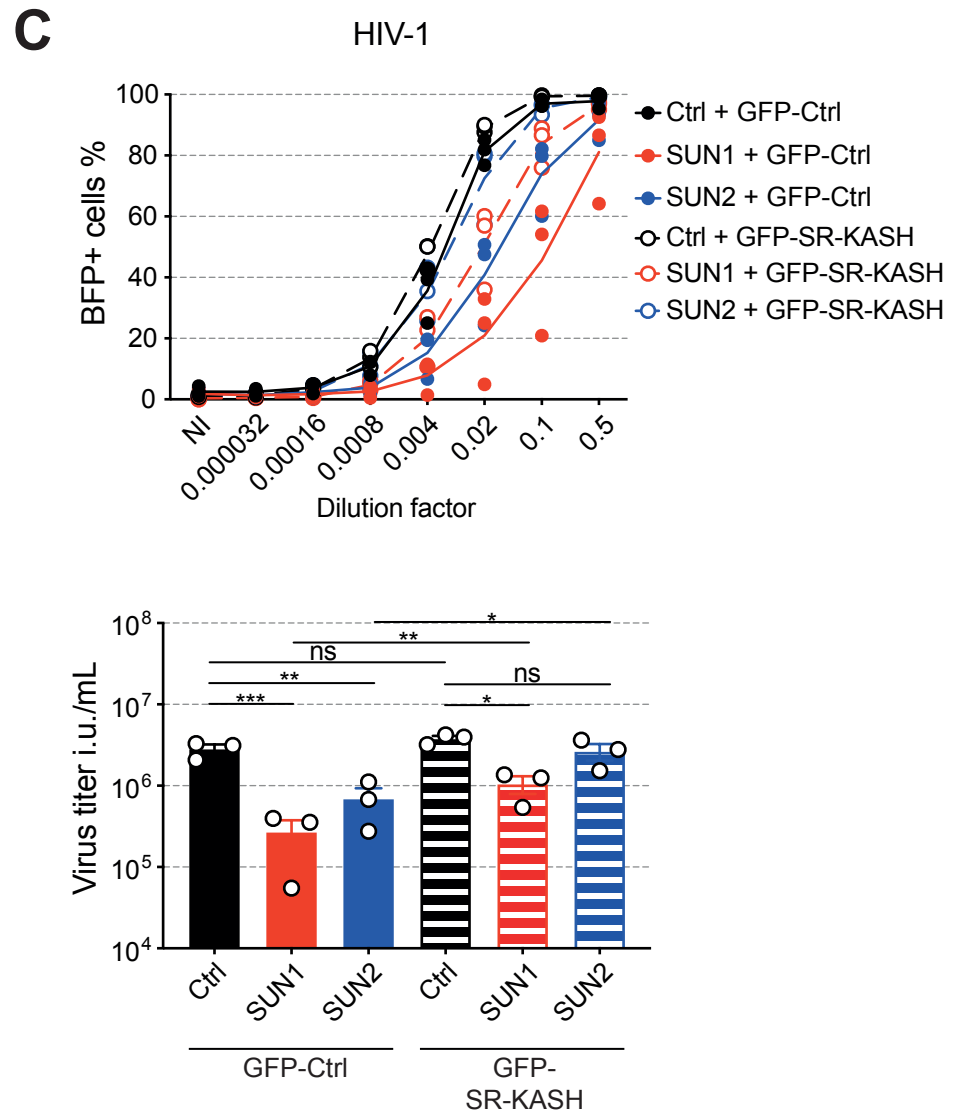

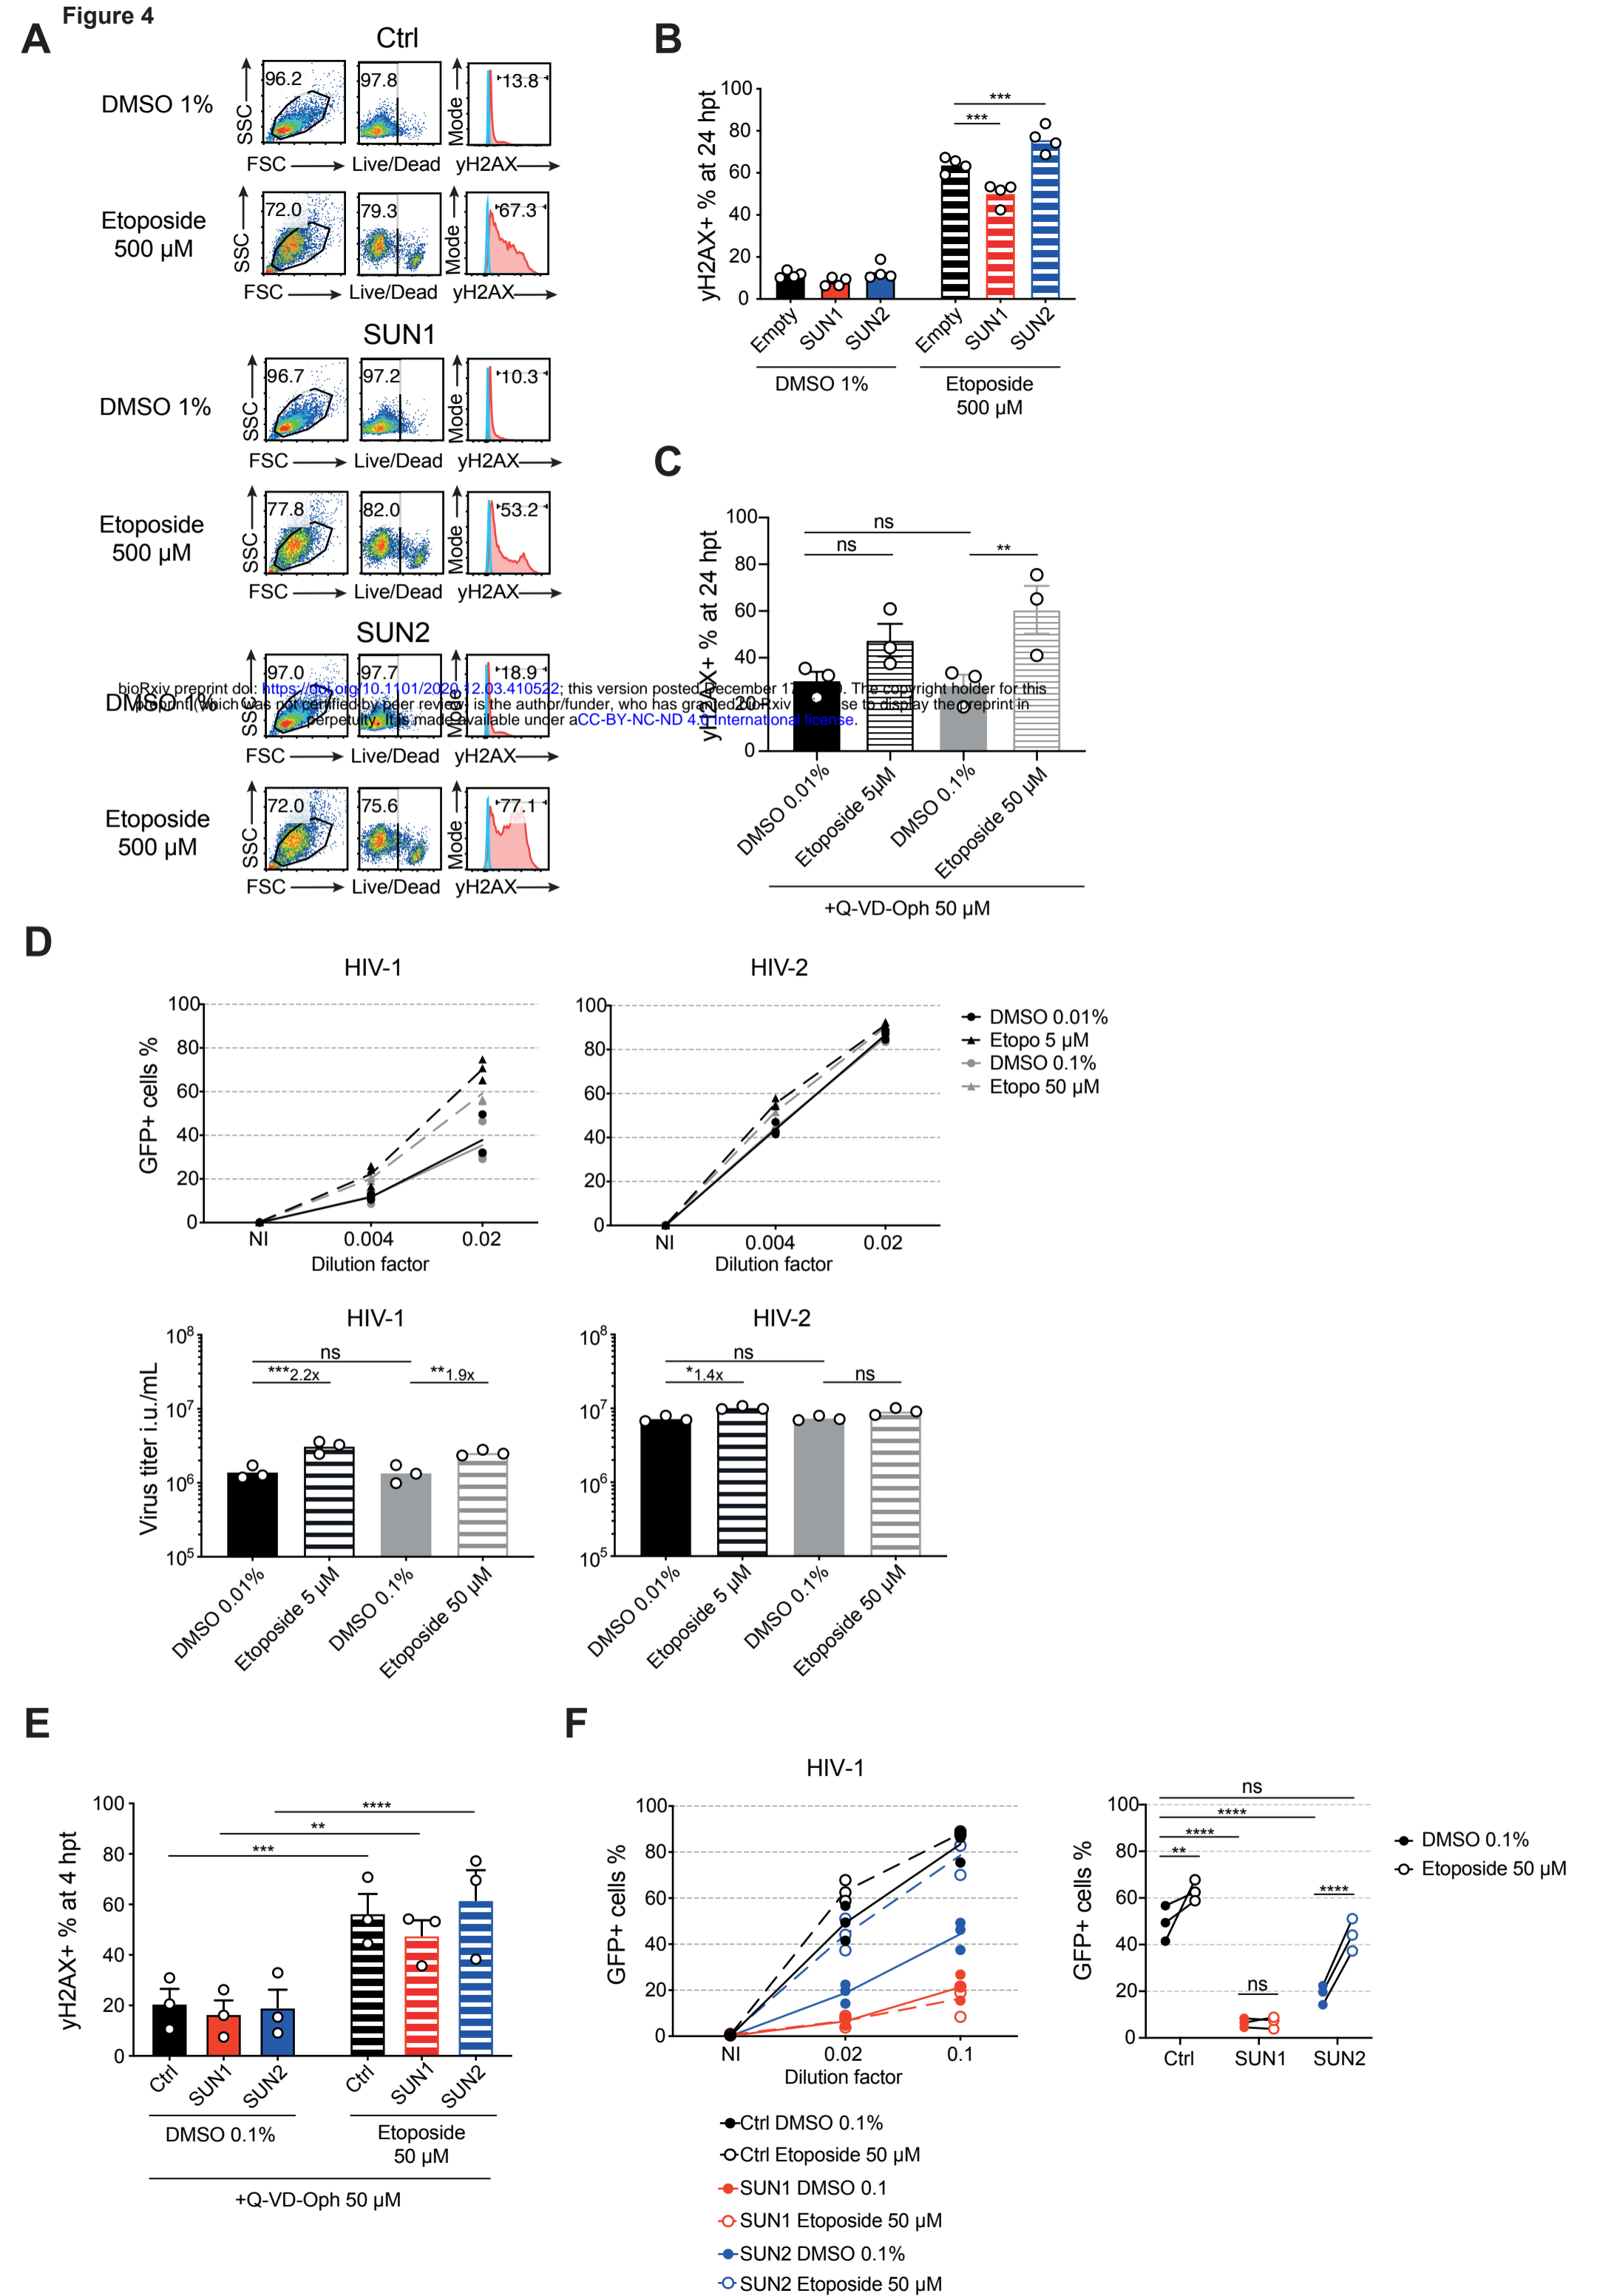

Figure 5

**A**

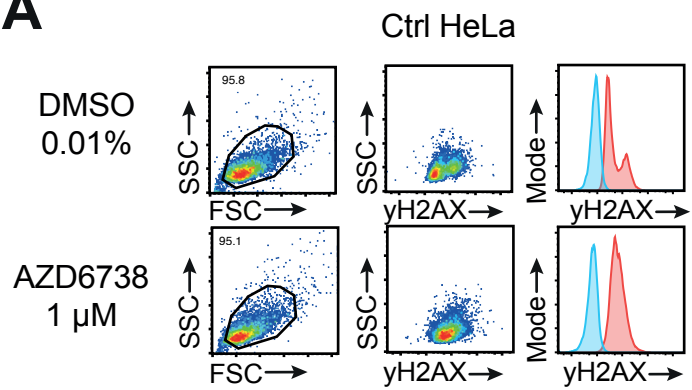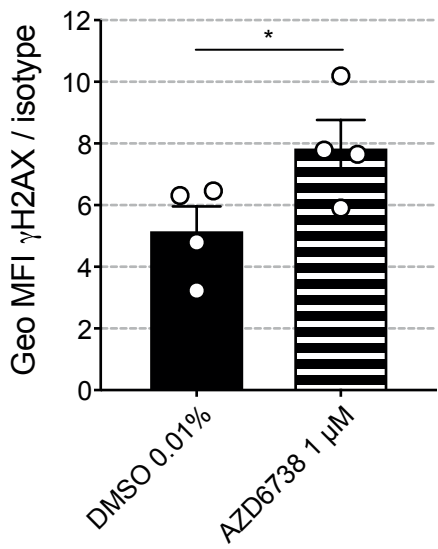

**B**

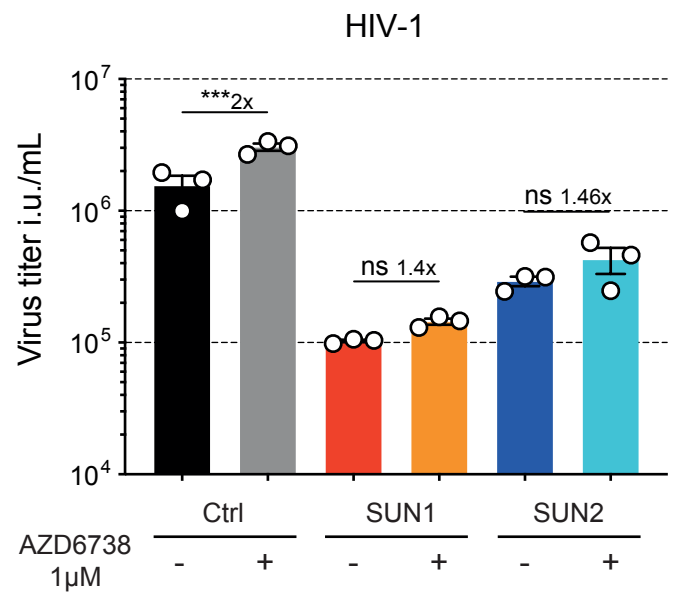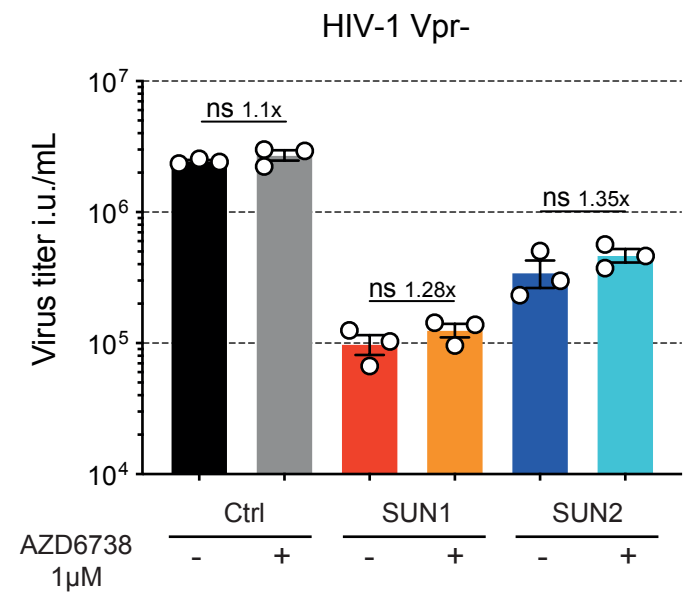

**Figure 6****A**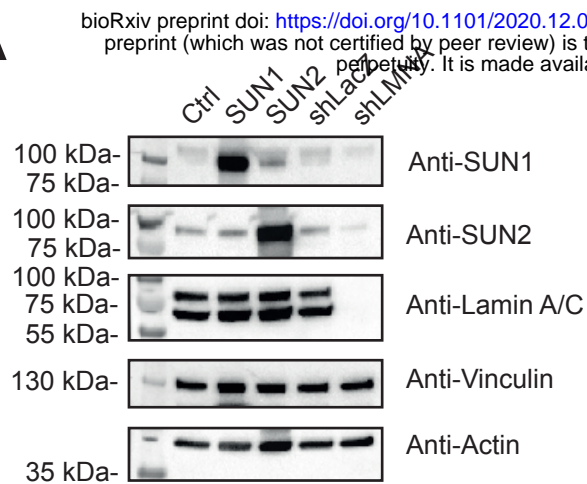**B**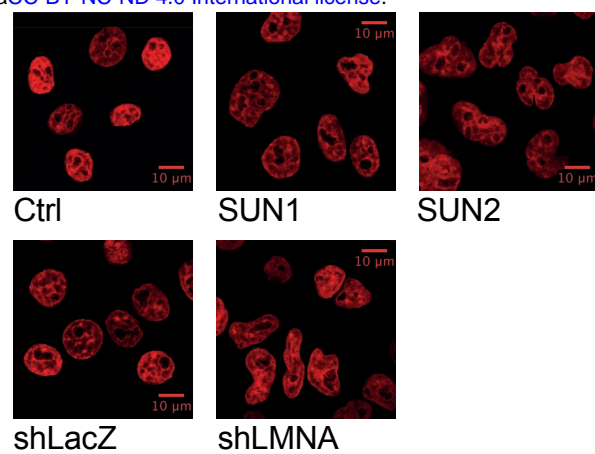**C**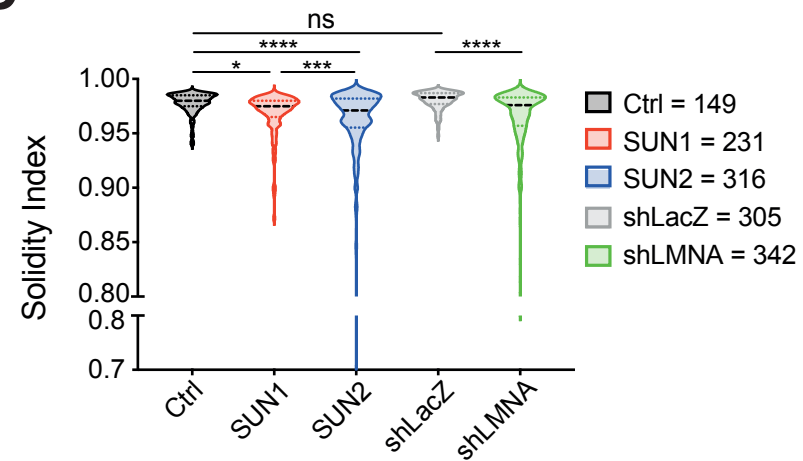**D**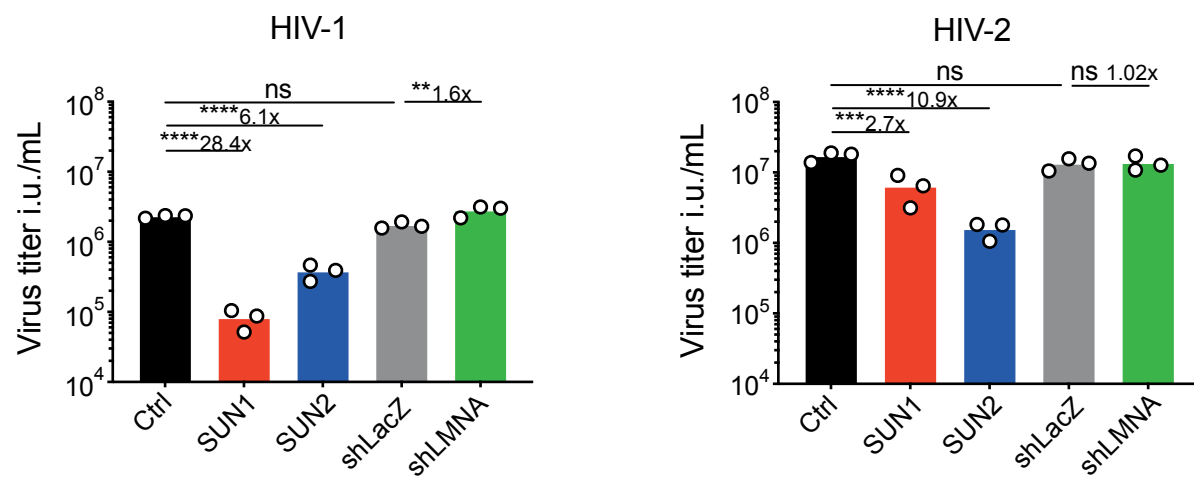**E**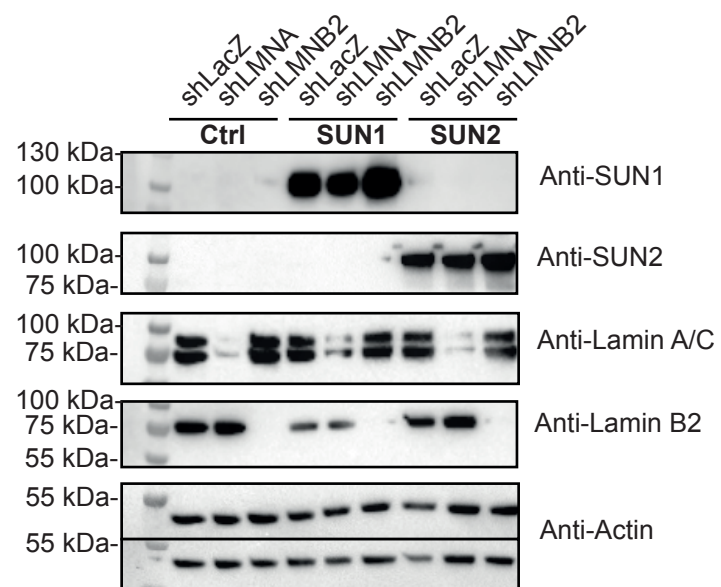**F**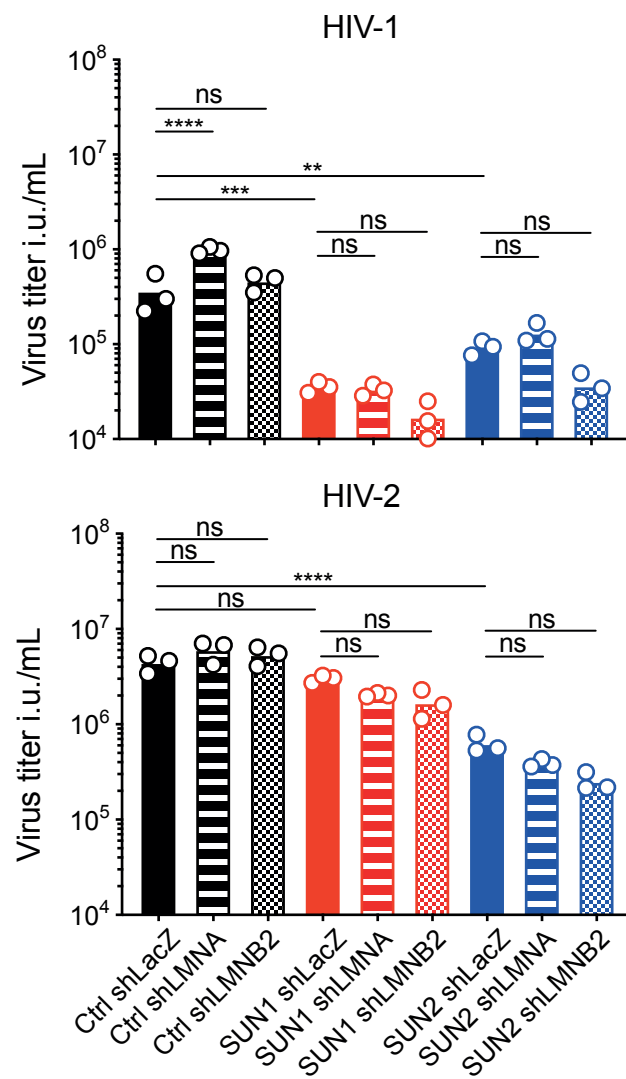**G**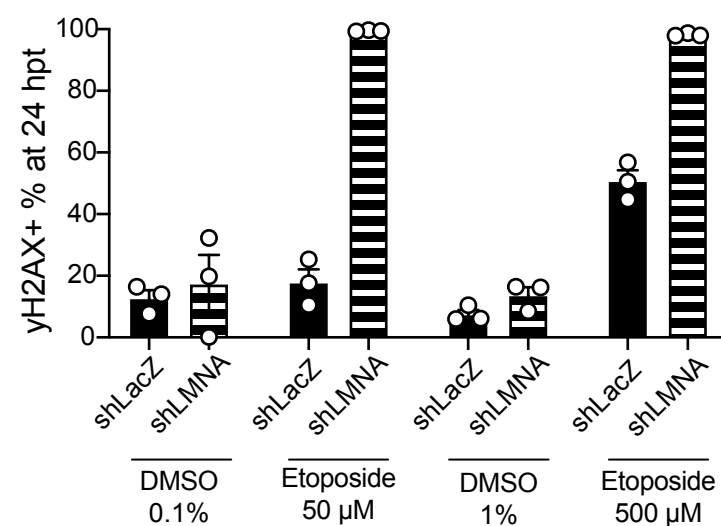

**Figure 7****A**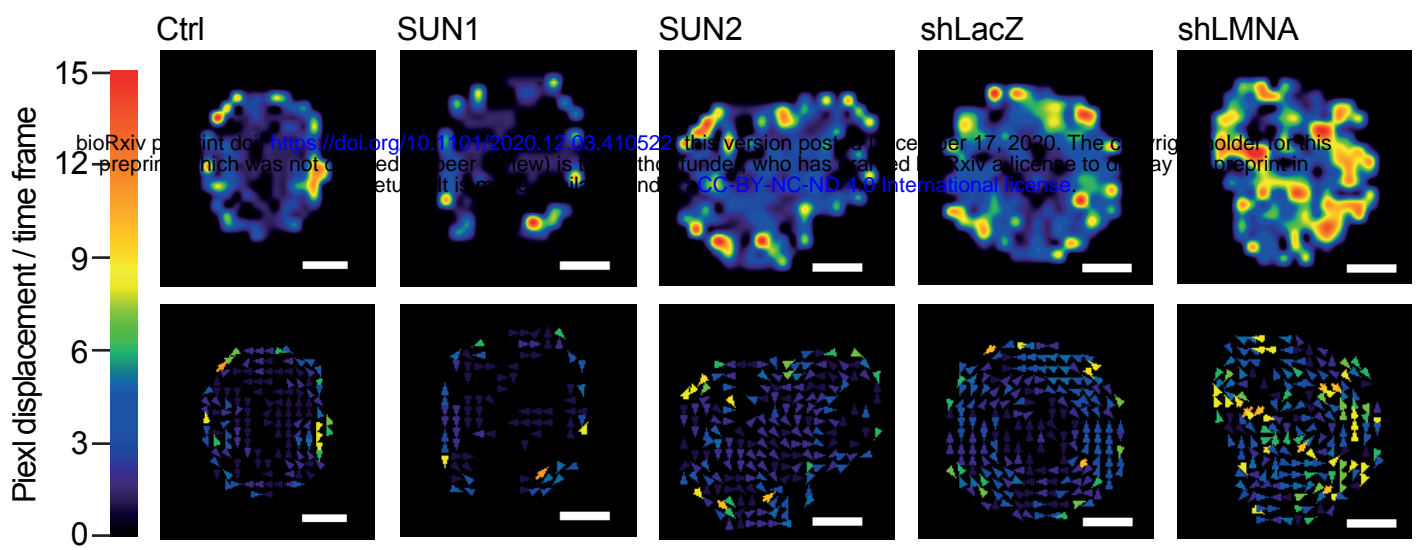**B**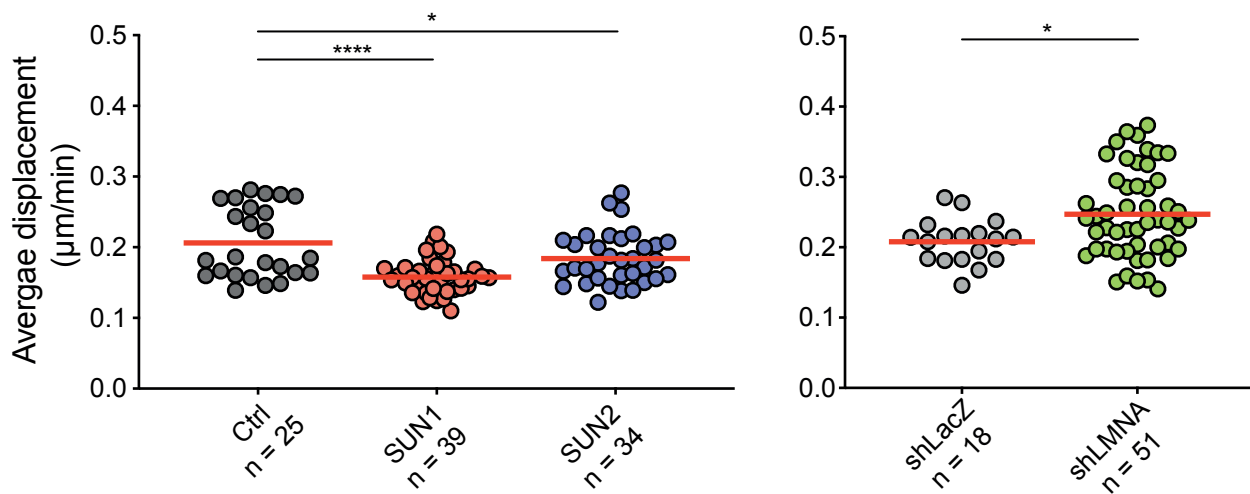**C**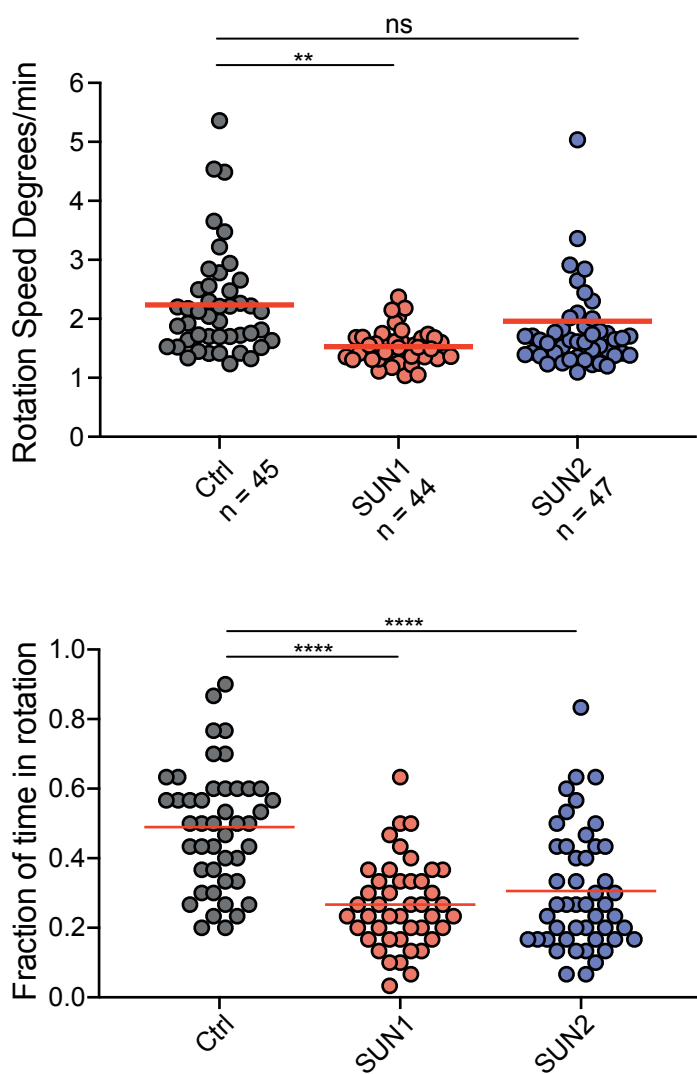

**A**

HIV-1 total DNA

HIV-1 2-LTR circles DNA

Integrated HIV-1 DNA

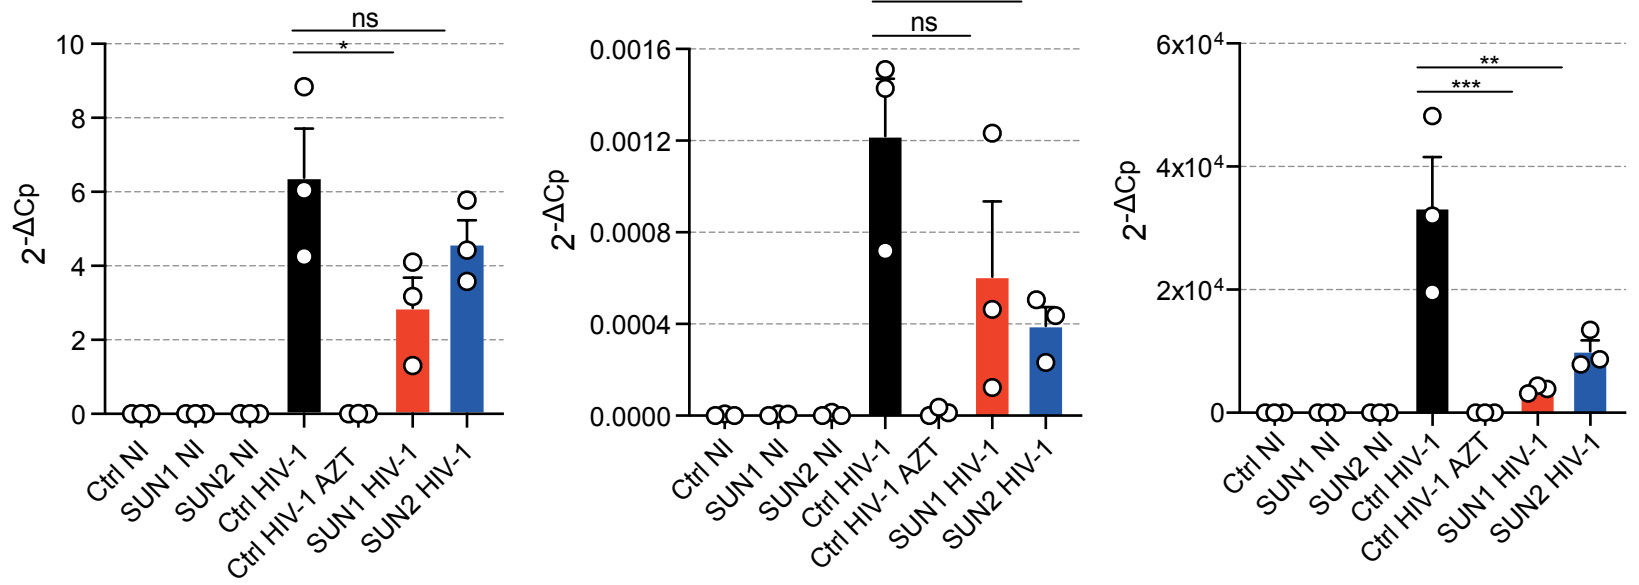

**B**

SUN1 vs Ctrl

SUN2 vs Ctrl

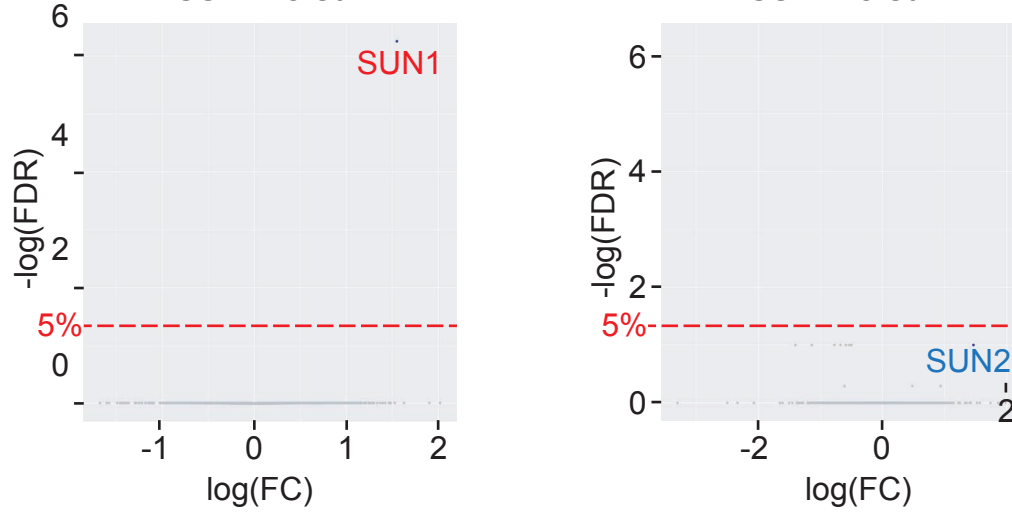

**Figure S2****A**

bioRxiv preprint doi: <https://doi.org/10.1101/2020.12.03.410522>; this version posted December 17, 2020. The copyright holder for this preprint (which was not certified by peer review) is the author/funder, who has granted bioRxiv a license to display the preprint in perpetuity. It is made available under aCC-BY-NC-ND 4.0 International license.

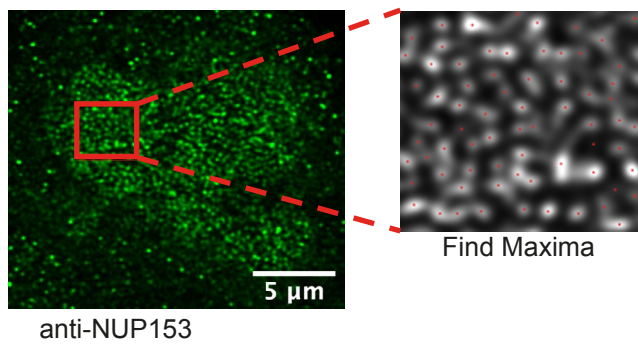**B**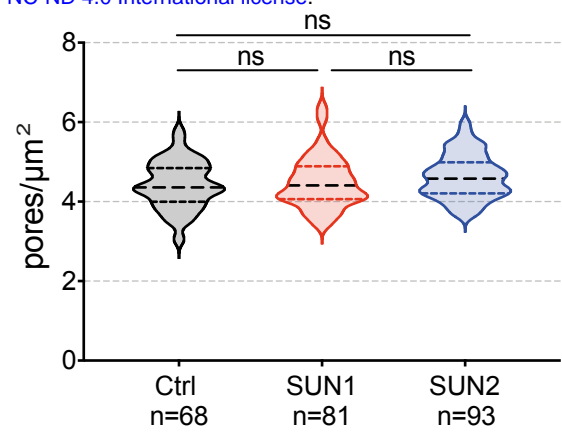**C**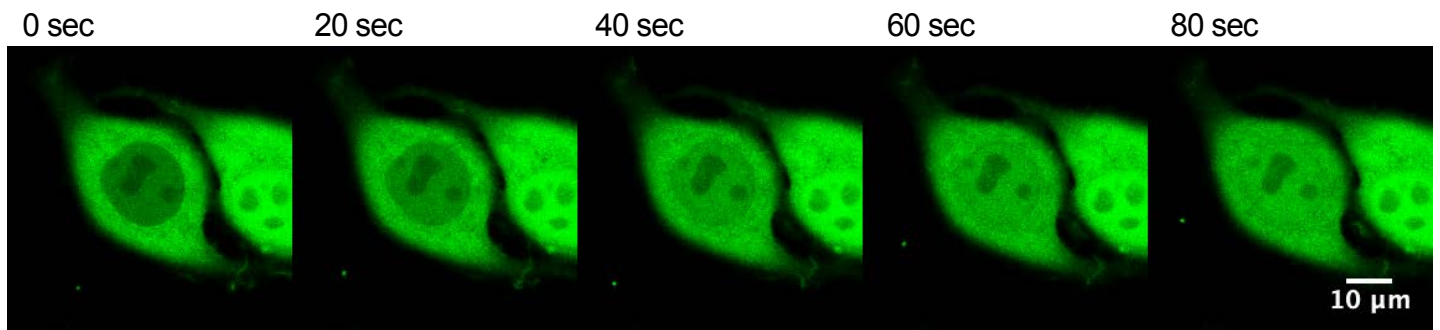**Fluorescence Intensity Recovery**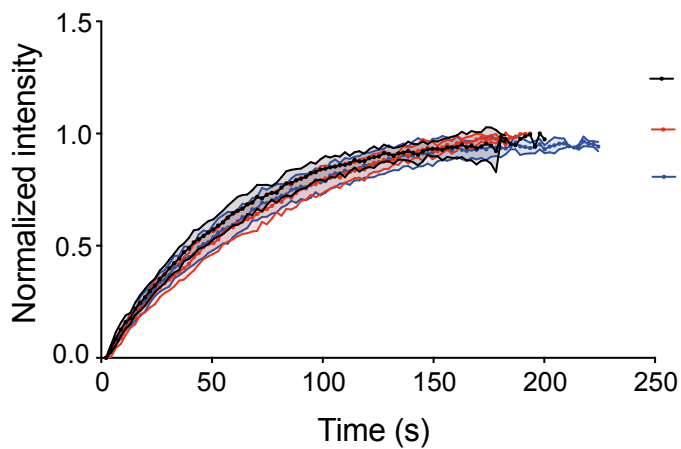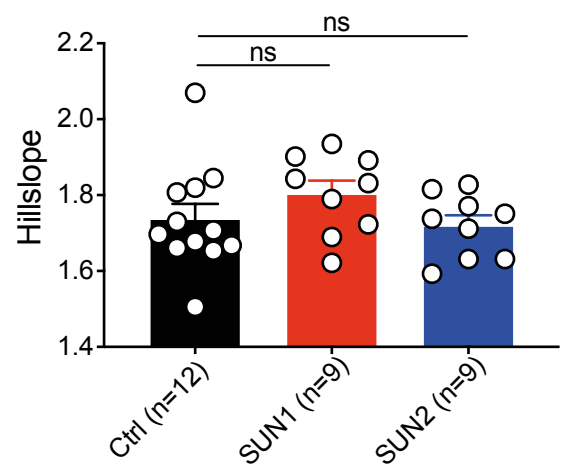**D**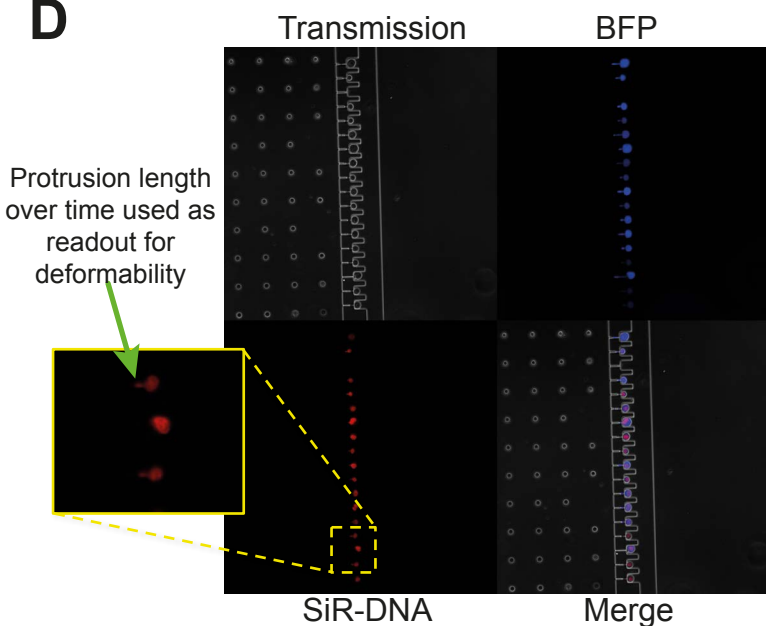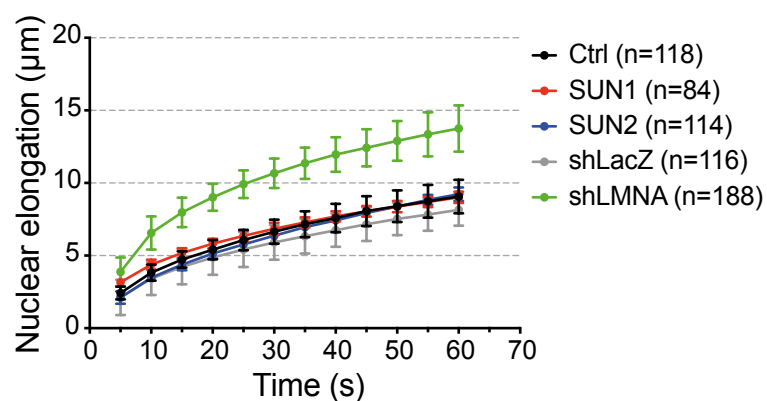



Figure S3

**A**

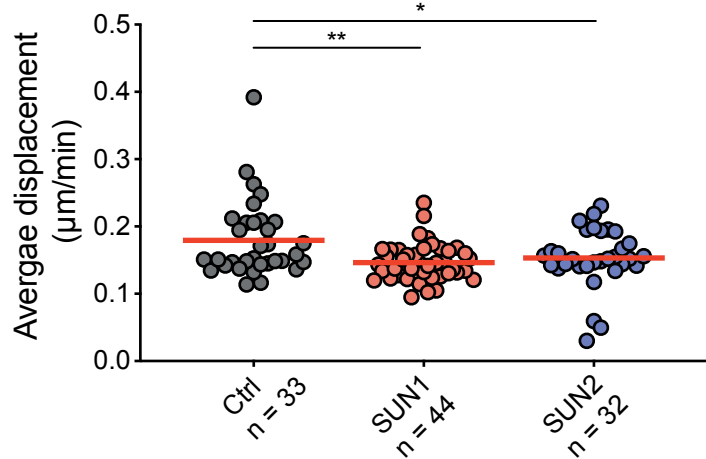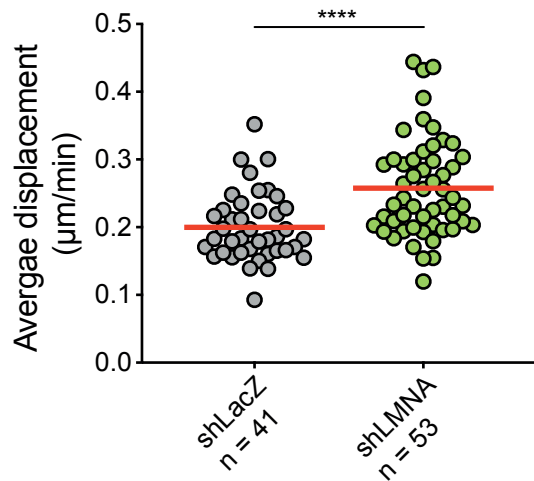

**B**

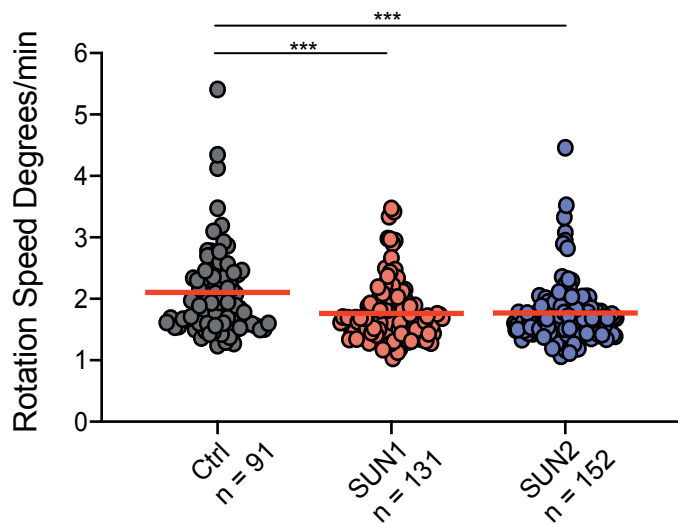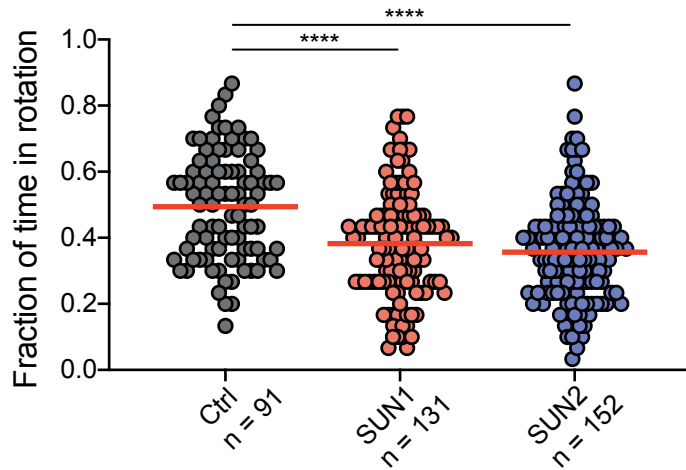

Source: https://www.biorxiv.org/content/10.1101/2020.12.03.410522v2.full.pdf
